# Supplementary material for: Suppression of pervasive noncoding transcription in embryonic stem cells by esBAF
Source: PubMed Central journal article supplement — Genes Dev. 2015 Feb 15;29(4):362–78. doi: 10.1101/gad.253534.114 (PMC4335293; doi:10.1101/gad.253534.114), 2015-02-15

**Suppression of pervasive noncoding transcription in embryonic stem cells by  
esBAF**

Sarah J. Hainer<sup>1,2</sup>, Weifeng Gu<sup>2,5</sup>, Benjamin R. Carone<sup>3,6</sup>, Benjamin D. Landry<sup>1,2</sup>, Oliver  
J. Rando<sup>3</sup>, Craig C. Mello<sup>2,4</sup>, Thomas G. Fazzio<sup>1,2</sup>

<sup>1</sup>Department of Molecular, Cell, and Cancer Biology, University of Massachusetts  
Medical School, Worcester, MA 01605, USA

<sup>2</sup>Program in Molecular Medicine, University of Massachusetts Medical School,  
Worcester, MA 01605, USA

<sup>3</sup>Department of Biochemistry and Molecular Pharmacology, University of Massachusetts  
Medical School, Worcester, MA 01605, USA

<sup>4</sup>Howard Hughes Medical Institute

<sup>5</sup>Current address: Department of Cell Biology and Neuroscience, University of California  
at Riverside, Riverside, CA 92521, USA

<sup>6</sup>Current address: Biology Department, Williams College, Williamstown, MA 01267, USA

**INVENTORY OF SUPPLEMENTAL MATERIAL**

**SUPPLEMENTAL MATERIALS AND METHODS**

**SUPPLEMENTAL FIGURE LEGENDS**

**SUPPLEMENTAL TABLE 1.** Oligonucleotides used in this study.

**SUPPLEMENTAL TABLE 2.** Homology constructs used for creation of SB lines.

**SUPPLEMENTAL FIGURE 1** accompanies Figures 1 and 2

**SUPPLEMENTAL FIGURE 2** accompanies Figures 1 and 2

**SUPPLEMENTAL FIGURE 3** accompanies Figures 1 and 2

**SUPPLEMENTAL FIGURE 4** accompanies Figure 2

**SUPPLEMENTAL FIGURE 5** accompanies Figure 2

**SUPPLEMENTAL FIGURE 6** accompanies Figure 2

**SUPPLEMENTAL FIGURE 7** accompanies Figure 2

**SUPPLEMENTAL FIGURE 8** accompanies Figure 4

**SUPPLEMENTAL FIGURE 9** accompanies Figures 3 and 4

**SUPPLEMENTAL FIGURE 10** accompanies Figure 4

**SUPPLEMENTAL FIGURE 11** accompanies Figure 5

**SUPPLEMENTAL FIGURE 12** accompanies Figures 5 and 6

**SUPPLEMENTAL FIGURE 13** accompanies Figure 7

## **SUPPLEMENTAL MATERIALS AND METHODS**

### **Chromatin immunoprecipitation**

Cells from RNAi-mediated KD in a 10 cm dish were crosslinked with a fixing solution (11% formaldehyde, 100 mM NaCl, 1 mM EDTA, 50 mM HEPES-KOH [pH 7.6]), incubated at room temperature for 10 min and quenched with glycine to a final concentration of 125 mM. Cells were washed with ice-cold PBS containing protease inhibitors (Thermo Scientific) and pelleted. Cell pellets were resuspended in 570  $\mu$ l SDS lysis buffer (1% SDS, 10 mM EDTA, 50 mM Tris [pH 8.0]) including protease inhibitors, incubated for 10 min on ice and sonicated in 15 ml conical tubes (BD Falcon) in a Bioruptor (UCD-200) at high, 2 times for 15 min of 30s on/30s off cycles followed by a 10,000 rcf spin at 4°C for 20 min. Supernatants were transferred to a new microfuge tube and pellets were discarded. 30  $\mu$ l of chromatin was stored overnight at 4°C for input samples while the remainder of the chromatin was diluted in 2.5 ml IP buffer (0.01% SDS, 1.1% TritonX-100, 1.2 mM EDTA, 16.7 mM Tris [pH 8.0], 167 mM NaCl), combined with antibody coupled magnetic beads, and incubated at 4°C overnight. H3 antibody (Abcam, ab1791), RNAPII (Santa Cruz, sc-9001), or IgG (Abcam, ab37415)

coupled protein A magnetic beads (NEB) were blocked with 5 mg/ml BSA overnight at 4°C. Magnetic beads were washed twice with IP buffer and 5 times with MVL buffer (50 mM Tris [pH 7.4], 250 mM NaCl, 1 mM EDTA, 0.1% TritonX-100) at 4°C for 5 min. Washed beads were eluted twice in 100 µl elution buffer (20 mM Tris [pH 8.0], 100 mM NaCl, 20 mM EDTA, 1% SDS), at 65°C on a thermomixer for 15 min. Eluted material was transferred to a new microfuge tube, combined and incubated at 65°C overnight to reverse crosslinking. Input DNA was diluted with 170 µl elution buffer and treated similarly. Samples were treated with RNaseA/T1 (Ambion) for 1 hr at 37°C and proteinase K (Ambion) for 1 hr at 55°C and then PCI extracted using phase-lock tubes (5 Prime). Ethanol precipitated ChIP-enriched DNA was then used as a template for quantitative PCR (qPCR) on an Eppendorf Realplex using a SYBR FAST kit (KAPA Biosystems) with specific primers (see primer table). Input DNA was used as a control for base-level enrichment and to calculate a standard curve. Occupancy was determined by the percent IP enrichment relative to input levels.

### **Micrococcal nuclease digestion**

ES cells were crosslinked with formaldehyde (Sigma) to a final concentration of 1%, incubated at room temperature for 10 min and quenched with glycine to a final concentration of 125 mM. Cells were washed with ice cold PBS and pelleted. Cell pellets were resuspended in lysis buffer (10 mM Tris [pH 7.5], 10 mM NaCl, 2 mM MgCl<sub>2</sub>, 0.5% NP-40, 1 mM CaCl<sub>2</sub>) with protease inhibitors (Roche) and incubated for 15 min at 4°C. Permeabilized cells were treated with ~10 Units/10<sup>6</sup> cells of micrococcal nuclease (Roche) for 5 min at 37°C. Reactions were stopped with the addition of EDTA. Control samples with no MNase addition were treated similarly. Samples were incubated for 4 hr at 4°C with rotation with RNaseA/T1 (Ambion) then incubated overnight at 65°C with 0.01% SDS and proteinase K (Ambion). DNA was extracted with PCI using phase-lock tubes, ethanol precipitated, and resuspended in 30 µL TE. Quality was confirmed through bioanalyzer analysis to ensure an equal size distribution of DNA fragments produced for each sample. For MNase-qPCR reactions, DNA was then used as a template for qPCR using a SYBR FAST kit (KAPA Biosystems) with specific primers (see primer table) on an Eppendorf Realplex. Undigested DNA was used as a control and to calculate a standard curve.

### **MNase-Seq**

#### *Library construction*

Paired-end libraries of MNase digested DNA were prepared as described previously (Henikoff et al. 2011). Briefly, samples were treated with CIP, end-repaired, A-tailed, and adaptor-ligated as described (Illumina). Between each step, DNA was cleaned with PCI extraction and ethanol precipitation. After adaptor ligation, DNA was selected and purified with Agencourt Ampure beads and then PCR amplified with KAPA HiFi polymerase using 16 cycles of PCR. The library was then purified with a Qiagen PCR purification kit, its concentration determined using a NanoDrop (Thermo), and the integrity was confirmed by sequencing ~10 fragments from each library. Libraries were individually sequenced on an Illumina HiSeq2000 using paired-end sequencing (100 bp) at the UMass Medical School deep sequencing core facility.

### *Data analysis*

Paired end reads were collapsed and adapter sequences were removed from fastq files. Reads were mapped to the mouse mm9 genome using Bowtie2 and only uniquely mapped reads with zero, one, or two mismatches were used for further analysis. The number of mapped reads for *EGFP* KD and for *Smarca4* KD MNase-Seq libraries is 231,336,591 and 225,479,272, respectively. The read size distribution was determined for each library and reads were sorted for nucleosome sized fragments (135-165). To calculate occupancy around TSS, DHS, or transcription factor sites, seqMINER (Ye et al. 2011) was used to sum read occurrence either 2000 bp upstream and downstream, 1000 bp upstream and downstream, or 500 bp upstream and downstream of the reference sequence. Occurrences were binned in 20 bp intervals and reads were normalized to the average genome-wide coverage. TSS reference sites were used based on mm9 TSS coordinates. DHS reference sites were based on mouse ENCODE data (GSM1014154). Coordinates of DHSs outside of TSSs were obtained by subtraction of called TSSs from ENCODE DHS coordinates (mm9).

### **CapSeq**

#### *Library construction*

Single-read libraries of cap-enriched RNA samples were prepared as previously described (Gu et al. 2012). Samples were treated with 0.1 U/ul terminator exonuclease (Epicentre) to degrade 5.8S, 18S, and 26S rRNA. 5S rRNA and tRNA was dephosphorylated with 20 U of CIP (NEB). RNA samples were simultaneously treated with 5 U of DNase I (NEB) to remove any residual DNA contamination. Proteins were removed with PCI extraction in phase-lock tubes (5 Prime) and RNA was precipitated with isopropanol. To remove the 5' cap, RNA was treated with 0.25 U/ul tobacco acid pyrophosphatase (TAP; Epicentre) and purified with PCI extraction and isopropanol precipitation. Individual 5' linkers with 4nt barcodes were then added to the decapped RNA using 2 U/ul of T4 RNA ligase followed by purification. First strand cDNA was then generated using random priming with the addition of a 3' linker sequence using 5 U/ul Superscript III (Invitrogen). cDNA was treated with RNase A/T1 (Ambion) and RNase H (NEB) to remove any RNA contamination. To increase the amount of cDNA, a linear PCR of 10 cycles was performed using a primer specific to the shared 5' linker sequence. To size select, cDNA was separated on a 15% acrylamide TBE denaturing gel (BioRad), visualized with SYBRGold (Invitrogen), and extracted (~125-170 nt). The cDNA was eluted in elution buffer (10 mM Tris [pH 7.5], 1 mM EDTA, 300 mM NaCl) overnight in a termomixer. The eluate was filtered through a Spin-X column (Costar) and precipitated. The cDNA was amplified and resolved on a 10% acrylamide TBE native gel and gel purified. The integrity of the libraries were confirmed by sequencing ~10 fragments from each library. Barcoded libraries were pooled together and sequenced in a single lane using single-read sequencing (100 bp) on an Illumina HiSeq2000 at the UMass Medical School deep sequencing core facility.

### *Data analysis*

Fastq files from single read libraries were collapsed and split based on the 5' barcode in the linker sequence. The 5' barcode and 3' linker sequences were then trimmed from reads and reads were mapped to the mouse mm9 genome using Bowtie1 with reads at

least 19 nt long (although most were 60 nt – 80 nt long). The number of reads for each library is: ESC *EGFP* KD replicate 1 – 22,316,313; ESC *EGFP* KD replicate 2 – 15,969,430; ESC *Smarca4* KD replicate 1 – 11,963,317; ESC *Smarca4* KD replicate 2 – 23,387,852; MEF *EGFP* KD replicate 1 – 20,430,774; MEF *EGFP* KD replicate 2 – 8,441,545; MEF *Smarca4* KD replicate 1 – 21,047,329; MEF *Smarca4* KD replicate 2 – 12,933,820. The mutation rate allowed for the alignment was 0 for reads 19-24 nt, 1 for 25-29 nt, 2 for 30-39 nt, 3 for 40-49 nt, 4 for 50-59 nt, and 5 for 60-69 nt, and 6 for 70 nt or bigger. Reads were separated into RNA classes including: coding, lincRNAs, miRNAs, piRNAs, and “structural” RNAs (tRNAs, rRNAs, snRNAs, and snoRNAs) based on Ensembl data, miRBase 18 and noncoding RNA database fRNAdb 2.4 (Mituyama et al. 2009). Read counts were normalized to parts per million non-structural RNA reads and a gff2 file was generated to visualize alignments on a Genome Browser Gbrowse 1.70 (Stein et al. 2002).

To map reads based on TSS location, a custom PERL script was used to search an interval of 2000 nt upstream to 500 nt downstream of a given read for the nearest gene. Based on the orientation of the 3' end of the CapSeq read, the read was assigned as either sense or antisense to the TSS, and the relative position between the CapSeq 5' end and the start site of the gene was output, where a negative number indicates the CapSeq 5' end is upstream of a gene. Antisense reads were then binned over 500 nt upstream to 100 nt downstream of the annotated TSS, averaged for the two CapSeq libraries, and called if there were 5 reads or more for one of the KD datasets. The reads from these libraries were then sorted by lowest to highest *Smarca4* KD ESCs and visualized through Java TreeView (Saldanha 2004).

To map reads based on DHS location, a custom PERL script was used to search an interval of 500 nt upstream to 500 nt downstream of a given read for the nearest gene, using the DHS locations obtained from the ENCODE data set (GSM1014154) with TSS locations removed. Using all reads called in this interval, similar analysis was performed as described above for antisense reads initiating from annotated TSSs.

To map reads within coding genes, a custom PERL script was used to search an interval of 500 nt downstream to 2000 nt downstream of annotated TSS locations for a given read for the nearest gene. Based on the orientation of the 3' end of the CapSeq read, the read was assigned as either sense or antisense to the coding gene. Using the sense and antisense reads as separate groups, similar analysis was performed as described above.

To map reads based on TTS location, a custom PERL script was used to search an interval of 300 nt upstream to 300 nt downstream of a given read for the nearest TTS. Based on the orientation of the 3' end of the CapSeq read, the read was assigned as either sense or antisense to the TTS. Using only the antisense reads, similar analysis was performed to that described above.

To analyze changes in transcription start site usage, only uniquely mapped, 5' perfectly matched, CapSeq reads of at least 30 nt were included in this analysis. RNA reads were normalized to 10 million sense protein coding reads, and a histogram for the 5' ends of mapped reads was generated for each sample. Sites with less than 5 reads were removed and sites were also removed if they were at least 10-fold less than the upstream or downstream neighboring gene as these sites could be generated by sequencing errors of the nearby abundant reads.

To compare antisense TSS CapSeq reads with MNase-Seq reads upstream of the NDR, CapSeq reads arising in the antisense direction from 500 nt upstream to 100 nt downstream of annotated TSSs were called if there were 5 or more reads in the averaged *EGFP* KD or *Smarca4* KD ESC CapSeq datasets for which there were also MNase-Seq reads. MNase-Seq reads were averaged -500 bp to -200 bp upstream of the annotated TSS for either *EGFP* KD or *Smarca4* KD. For both the CapSeq and MNase-Seq datasets, the *Smarca4* KD data was divided by the *EGFP* KD data, and the  $\log_2$  (ratio) was calculated. The data was clustered using Cluster 3.0 (de Hoon et al. 2004) and visualized by Java TreeView (Saldanha 2004).

## **Whole-transcript, strand-specific RNA-Seq**

### *Library construction*

Strand-specific RNA-Seq libraries were prepared similarly to Kumar et al, with modifications (Levin et al. 2010; Kumar et al. 2012). Briefly, 5  $\mu$ g of total RNA was depleted of rRNA using a Ribo-Zero Gold kit (Epicentre) and first strand cDNA was made using 200 ng RNA, 3  $\mu$ g random hexamers, 1  $\mu$ g Superscript III, and standard dNTPs in the presence of Actinomycin D. First strand cDNA was purified by PCI extraction, ethanol precipitated, and resuspended in water. Second strand cDNA was synthesized with *E. coli* DNA polymerase, in the presence of *E. coli* DNA ligase and RNase H (all from NEB), using dNTPs in which dUTP was substituted for dTTP, at 16°C for 2 hrs. After purification on a Clean and Concentrate column (Zymo Research), cDNA was fragmented using Fragmentase (NEB), PCI extracted and precipitated as above. End repair, A-tailing, and barcoded adapter ligation were performed as described (Illumina), and the second strand cDNA was digested with USER enzyme (NEB). Libraries were amplified from the resulting adapter-ligated first-strand cDNA using Phusion (NEB) and 16 cycles of amplification. Libraries were size-selected on 1.5% agarose gels to a size range of ~180-250 bp. The integrity of the libraries were confirmed by sequencing ~10 fragments from each library. Libraries were combined and sequenced (single read 50 bp with direction corresponding to the first strand cDNA) on a single lane of an Illumina HiSeq2000 at the UMass Medical School deep sequencing core facility.

### *Data analysis*

Fastq files from single read libraries were collapsed and split based on the 5' barcode in the linker sequence. The 5' barcode sequences were then trimmed from reads and reads were mapped to the mouse mm9 genome using Bowtie1 with reads at least 19 nt long. Read counts were normalized to parts per million reads. The number of reads for each library is: *EGFP* KD replicate 1 – 26,490,423; *EGFP* KD replicate 2 – 23,440,035; *Smarca4* KD replicate 1 – 25,155,038; *Smarca4* KD replicate 2 – 14,990,552.

To map reads based on TSS location, a custom PERL script was used to search an interval of 2000 nt upstream to 500 nt downstream of a given read for the nearest gene. Antisense reads were then binned, averaged for the two RNA-Seq libraries, and called if there were 5 reads or more for one of the KD datasets. The reads from these libraries were then sorted from lowest to highest in *Smarca4* KD and visualized through Java TreeView (Saldanha 2004). To map reads based on DHS location, a custom PERL script was used to search an interval of 1000 nt upstream to 1000 nt downstream

of a given read for the nearest gene. All reads were then binned, averaged for the two RNA-Seq libraries, and called if there were 5 reads or more for one of the KD datasets. The reads from these libraries were clustered using Cluster 3.0 (de Hoon et al. 2004) and visualized through Java TreeView (Saldanha 2004). The DEseq software package (Anders and Huber, 2010) was used to identify transcripts whose levels were significantly altered upon *Smarca4* KD, and the pROC package (Robin et al. 2011) was used to create ROC curves.

### **Generation of nucleosome superbinder lines.**

Using the CRISPR/Cas9 system to stimulate recombination (Cong et al. 2013), the nucleosome superbinder sequence (Wang et al. 2011b) was inserted flanking DHS-chr2, in the -1 nucleosome position, and -60, +60, and +180 bp shifted from the -1 nucleosome of the *Ttc25* gene.

To generate the donor plasmid for the DHS-chr2 SB lines, a synthetic sequence for the superbinder was generated (IDT) and its sequence confirmed. This sequence was cloned into the TOPO TA vector (Invitrogen) and sequenced to validate proper ligation.

To generate the donor plasmids for the *Ttc25* SB lines, synthetic sequences in which the superbinder replaced the endogenous sequence at each location were generated (Invitrogen) and their sequences confirmed. These sequences were cloned into a pBlueScript vector containing ~1400 bp of WT *Ttc25* promoter region. For each construct, the PstI-PstI fragment of the homology region was replaced with the PstI-PstI fragment of each synthetic DNA, creating constructs in which the superbinder sequence was surrounded by ~600 bp of endogenous sequence on each side to serve as homology arms for recombination. The plasmid was sequenced to confirm ligation in the proper orientation.

A CRISPR/guideRNA plasmid specific for either DHS-chr2 or *Ttc25* was generated by phosphorylating and annealing oligonucleotides (see Table S1) targeting the region flanking DHS-chr2 or upstream of the *Ttc25* promoter containing a G followed by 19 additional bases of the guide strand plus sticky ends, ligating into a variant of the pX330 plasmid (Cong et al. 2013) into which we inserted a puromycin-resistance cassette.

In a 6-well plate,  $2 \times 10^5$  E14 ES cells were seeded 24 h prior to transfection. Cells were transfected with 3  $\mu$ g of the CRISPR/guideRNA plasmid and 3  $\mu$ g of the donor plasmid using 24  $\mu$ L of FuGENE HD (Promega) in 100  $\mu$ L of OptiMEM. 12 h post transfection cells were split onto three 10 cm plates at clonal density. 48 h post transfection DMEM containing 2  $\mu$ g/mL puromycin was added for 40 h. Media was then removed, cells were washed with 1XPBS, and fresh media without puromycin was added. 8 days post transfection, clones were picked, trypsinized, and grown in 96-well plates for ~2 days. After splitting clones into multiple 96 well plates, genomic DNA was isolated from one, and the DHS-chr2 or *Ttc25* promoter region was amplified and digested using SacII. In the superbinder knock-in strains, there is a unique SacII site. The digestion was visualized on a 1% agarose gel, and the PCR from homozygote or heterozygote candidates was cloned using TOPO TA cloning (Invitrogen) and sent for individual sequencing to validate the integration of the superbinder nucleosome into one or both chromosomal copies.

## SUPPLEMENTAL FIGURE LEGENDS

### Supplemental Figure 1. Widespread upregulation of ncRNAs in *Smarca4* KD cells.

(A) Efficient KD of *Smarca4* in ESCs is confirmed by random primed RT-qPCR with expression levels normalized to GAPDH and shown relative to *EGFP* KD. Shown are the mean +/- SD values of three biological replicates after acute (48 hour) KD. (B) Efficient KD of *Smarca4* is confirmed by Western blotting, where actin serves as a loading control. (C) Levels of Brg1, Oct4, and Nanog in *EGFP* KD and *Smarca4* KD ESCs were confirmed by Western blotting, where actin serves as a loading control. (D) Staining of ESCs for alkaline phosphatase, a marker for pluripotent stem cells, after *EGFP* or *Smarca4* KD. (E-G) Validation of CapSeq and whole-transcript RNA-Seq datasets. (E) Upregulation of antisense transcripts upstream of nine coding genes were confirmed with strand-specific RT-qPCR. Shown are the mean +/- SD values of three biological replicates relative to *EGFP* KD. (F) Validation of RNA-Seq data by random primed RT-qPCR shows an increase in antisense transcript production from 14 coding gene promoters, but not four control locations, in *Smarca4* KD cells. (G) Oligo-dT primed RT-qPCR (expression levels shown as in (F)) shows that antisense transcripts increased upon *Smarca4* KD are polyadenylated. (H) Efficient KD of *Smarca4*, *Smarcc1*, and *Smarcd1* in ESCs is confirmed by random primed RT-qPCR. Expression levels are shown as in (A). For all RT-qPCR analyses, statistical significance is indicated with an asterisk (\* $p < 0.05$ , \*\* $p < 0.01$ , ns=not significant).

### Supplemental Figure 2. Comparison of ncRNAs in ESCs and MEFs from CapSeq data.

(A-H) Violin plots quantifying noncoding transcripts surrounding DHSs (+/- 500 bp) (A), TSSs (-500 to +100 bp) (B), intragenic regions (>500 bp from TSS) (C), or TTSs (-500 bp to +500 bp from TTS) (D) in averaged biological replicates of *EGFP* KD and *Smarca4* KD ESC and MEF CapSeq experiments. (E-H) Heatmaps quantifying noncoding transcripts surrounding DHSs (+/- 500 bp) (E), TSSs (-500 to +100 bp) (F), intragenic regions (antisense only, > 500 bp from TSS) (G), or TTSs (antisense only, -500 to +500 bp from TTS) (H) in WT ESC and embryoid body (EB) CapSeq experiments. Expression is indicated as  $\log_2$ (normalized reads).

### Supplemental Figure 3. Altered positioning of transcription start sites in ESCs upon *Smarca4* KD.

(A-C) TSS positions from *EGFP* KD (A) or *Smarca4* KD (B) ESC CapSeq data are plotted relative to the annotated TSS. The shaded area indicates the variance between the two replicates. (C) Overlay of *EGFP* KD and *Smarca4* KD ESC start site data shown in (A-B). (D-F) TSS positions from *EGFP* KD (D) or *Smarca4* KD (E) MEF CapSeq data are plotted as in A. (F) Overlay of *EGFP* KD and *Smarca4* KD MEF start site data. A K-S test demonstrated statistically significant differences between KDs. (p-value ESC *EGFP* KD vs *Smarca4* KD =  $1.532e-14$ ; p-value MEF *EGFP* KD vs *Smarca4* KD =  $1.371e-7$ ). (E) Genome browser tracks of two coding genes with altered start sites in ESCs. Isoforms are shown in an orange box below the scale, with introns indicated as black lines. Browser tracks of normalized CapSeq reads of one replicate from *EGFP* KD



and *Smarca4* KD are shown in log<sub>2</sub> scale. Blue bars indicate transcription from the Crick strand, while red bars indicate transcription from the Watson strand. The number of normalized reads for each sample is indicated.

**Supplemental Figure 4. ncRNA expression is altered more at esBAF occupied regions.**

(A-D) Histogram of normalized transcripts obtained from RNA-Seq analysis surrounding the DHSs (A-B) and TSSs (C-D) in *EGFP* KD and *Smarca4* KD ESCs. Transcripts are sorted by esBAF bound (A and C) or esBAF unbound (B and D) regions.

**Supplemental Figure 5. esBAF regulates the expression of many more ncRNAs than mRNAs in ESCs.**

(A) Table indicating the number of ncRNAs or mRNAs altered in *Smarca4* KD relative to *EGFP* KD control ESCs. (B) Heatmap quantifying mRNA transcripts in *EGFP* KD and *Smarca4* KD RNA-Seq experiments. Expression is indicated as log<sub>2</sub>(normalized reads). (C-E) Scatterplot showing the correlation between sense (mRNA) and as-TSS transcripts in *EGFP* KD (C), *Smarca4* KD (D), or log<sub>2</sub> (*Smarca4* KD/*EGFP* KD) (E).

**Supplemental Figure 6. Independent esiRNA confirms changes in ncRNA expression upon *Smarca4* KD.**

(A) Efficient KD of *Smarca4* with independent esiRNAs in ESCs is confirmed by random primed RT-qPCR with expression levels normalized to GAPDH and shown relative to *EGFP* KD. Shown are the mean +/- SD values of three biological replicates. (B-C) Validation of RNA-Seq data by random primed RT-qPCR using independent esiRNAs to *Smarca4* at DHSs (B) or antisense to TSSs (C). Significance is indicated with an asterisk (\*p<0.05, \*\*p<0.01, ns=not significant).

**Supplemental Figure 7. ncRNAs are increased upon *Smarca4* KD in ESCs but not MEFs.**

(A) Efficient KD of *Smarca4* in MEFs is confirmed by random primed RT-qPCR with expression levels shown relative to *EGFP* KD. (B) *Smarca4* KD is confirmed by Western blotting, where actin serves as a loading control. (C) Validation of MEF CapSeq datasets. Levels of antisense transcripts produced upstream of coding genes were confirmed with random primed RT-qPCR on *EGFP* KD and *Smarca4* KD cells. Expression levels are shown relative to the *EGFP* KD. Shown are the mean +/- SD values of three biological replicates. (D-E) Genome browser tracks of two DHSs (D) and two coding genes (E) in *EGFP* KD and *Smarca4* KD MEFs, as in Fig. 1. (F) Histone H3 levels were determined in *EGFP* KD and *Smarca4* KD MEFs by ChIP-qPCR over the -1 nucleosome. Significance is indicated with an asterisk (\*p<0.05, \*\*p<0.01, ns=not significant).

**Supplemental Figure 8. Alterations in nucleosome occupancy upon *Smarca4* KD, sorted by gene expression.**

(A) Bioanalyzer traces of *EGFP* KD and *Smarca4* KD MNase digested samples used for library construction. (B) Aggregation plots comparing nucleosome occupancy in control (*EGFP*) KD and KD of the Mbd3/NuRD component *Mbd3* at DHSs. (C-G)

Aggregation plots of the relative nucleosome occupancy obtained from the MNase-Seq data upon *EGFP* KD or *Smarca4* KD over TSSs +/- 2 kb in ESCs. Plots are sorted by gene expression in ESCs (GSM521650), broken into quintiles from highest (C) to lowest (G).

**Supplemental Figure 9. Validation of nucleosome changes around TSSs.**

(A-B) Histone H3 levels were determined in *EGFP* KD and *Smarca4* KD ESCs by ChIP-qPCR over the -1 nucleosome (A) or +1 nucleosome (B) of genes found to be altered in the *Smarca4* KD MNase-Seq dataset. Histone H3 levels are expressed as a fraction of the input. Shown are the mean +/- SD values of three biological replicates. (C)

Validation of alterations in nuclease accessibility over NDRs near TSSs. Accessibility to MNase treatment was determined in *EGFP* KD and *Smarca4* KD ESCs by MNase-qPCR over the NDR of genes found to be altered in the *Smarca4* KD MNase-Seq dataset. Relative protection from undigested chromatin is shown as the mean +/- SD values of three replicates. Significance is indicated with an asterisk (\* $p < 0.05$ , \*\* $p < 0.01$ , ns=not significant).

**Supplemental Figure 10. Nucleosome occupancy is altered more at genes bound and/or regulated by esBAF upon *Smarca4* KD.**

Aggregation plots of relative nucleosome occupancy upon *EGFP* KD or *Smarca4* KD over TSSs +/- 2 kb in ESCs. (A-E) Plots are sorted by *Smarca4* KD gene expression, obtained from published microarray data (Yildirim et al. 2011). Reads are sorted by the top 20% of ESC genes upregulated in the KD datasets (A) through the 20% of genes most downregulated in the KD datasets (E), with the remaining 60% of genes broken into three intermediate classes of expression. (F-H) Plots are sorted by Brg1 occupancy, obtained from published ChIPseq data (Yildirim et al. 2011; Ho et al. 2009a). Reads are sorted by the genes with the most occupancy (F), intermediate occupancy (G) and lowest occupancy (H).

**Supplemental Figure 11. Confirmation of superbinder positioning flanking a DHS.**

(A) Diagram of the DHS locus with qPCR amplicons for panels (D) and (E) depicted. (B) Efficient KD of *Smarca4* in WT and SB ESCs is confirmed by random primed RT-qPCR with expression levels shown relative to *EGFP* KD. (C) *Smarca4* KD is confirmed by Western blotting, where actin serves as a loading control. (D) Histone H3 ChIP-qPCR over the WT -1 nucleosome in either *EGFP* KD or *Smarca4* KD in WT or SB homozygote (SB/SB) lines. Histone H3 levels in cells knocked down as indicated are expressed as a fraction of the input. Shown are the mean +/- SD values of three replicates. (E) Histone H3 ChIP-qPCR over the SB -1 nucleosome in either *EGFP* KD or *Smarca4* KD in WT or nucleosome SB/SB lines. Histone H3 levels are shown as in (D). Significance is indicated with an asterisk (\* $p < 0.05$ , \*\* $p < 0.01$ , ns=not significant).

**Supplemental Figure 12. Confirmation of superbinder positioning at the -1 nucleosome position of *Ttc25*.**

(A) Diagram of the *Ttc25* locus with qPCR amplicons for panels (D) and (E) depicted. (B) Efficient KD of *Smarca4* in WT and SB ESCs is confirmed by random primed RT-qPCR with expression levels shown relative to *EGFP* KD. (C) *Smarca4* KD is confirmed

by Western blotting, where actin serves as a loading control. **(D)** Histone H3 ChIP-qPCR over the WT -1 nucleosome in either *EGFP* KD or *Smarca4* KD in WT or SB heterozygote (+/SB) or homozygote (SB/SB) lines. Histone H3 levels in cells knocked down as indicated are expressed as a fraction of the input. Shown are the mean +/- SD values of three replicates. **(E)** Histone H3 ChIP-qPCR over the SB -1 nucleosome in either *EGFP* KD or *Smarca4* KD in WT or nucleosome +/SB or SB/SB lines. Histone H3 levels are shown as in **(D)**. **(F)** Random primed RT-qPCR in either *EGFP* KD or *Smarca4* KD in WT or nucleosome +/SB or SB/SB lines for as-TSS unlinked to *Ttc25* indicates that knock-in of the SB sequence upstream of the *Ttc25* does not affect unlinked antisense transcripts. Significance is indicated with an asterisk (\* $p < 0.05$ , \*\* $p < 0.01$ , ns=not significant).

**Supplemental Figure 13. Confirmation of superbinder positioning at -60, +60, and +180 relative to the -1 nucleosome position of *Ttc25*.**

**(A-C)** Efficient KD of *Smarca4* in WT or SB/SB ESCs is confirmed by random primed RT-qPCR with expression levels normalized to GAPDH and shown relative to *EGFP* KD. Shown are the mean +/- SD values of three biological replicates. **(D-F)** Histone H3 ChIP-qPCR over the SB -1 nucleosome in either *EGFP* KD or *Smarca4* KD in WT or SB/SB lines. Histone H3 levels in cells knocked down as indicated are expressed as a fraction of the input. Shown are the mean +/- SD values of three replicates. **(G-I)** RNAPII or IgG control ChIP-qPCR upstream of the *Ttc25* locus in WT or SB/SB lines, upon wither *EGFP* KD or *Smarca4* KD, expressed as a fraction of the input. Shown are the mean +/- SD values of three biological replicates. **(J-L)** RNAPII or IgG control ChIP-qPCR over the *Ttc25* locus in WT or SB/SB lines, upon either *EGFP* KD or *Smarca4* KD, expressed as a fraction of the input. Shown are the mean +/- SD values of three biological replicates. Significance is indicated with an asterisk (\* $p < 0.05$ , \*\* $p < 0.01$ , ns=not significant).

**SUPPLEMENTAL TABLES**

**Supplemental Table 1. Oligonucleotides used in this study.**

| Name             | Sequence                   | Location/ amplicon product       | Purpose                    |
|------------------|----------------------------|----------------------------------|----------------------------|
| <i>GAPDH</i> F   | TTGATGGCAACA<br>ATCTCCAC   | chr6:125,113,383-<br>125,115,326 | RT-qPCR for mouse<br>GAPDH |
| <i>GAPDH</i> R   | CGTCCCGTAGAC<br>AAAATGGT   | chr6:125,113,383-<br>125,115,326 | RT-qPCR for mouse<br>GAPDH |
| <i>Smarca4</i> F | GGACAGACACCT<br>GCTATTGGAC | chr9:21,447,163-<br>21,452,081   | RT-qPCR for <i>Smarca4</i> |
| <i>Smarca4</i> R | GGCTACTTCATA<br>CCCTGGGTTC | chr9:21,447,163-<br>21,452,081   | RT-qPCR for <i>Smarca4</i> |
| <i>Smarcc1</i> F | GAAGAAGTACCC<br>CTGGAATTGG | chr14:85,158,440-<br>85,158,626  | RT-qPCR for <i>Smarcc1</i> |
| <i>Smarcc1</i> R | GCTGACCATCAG               | chr14:85,158,440-                | RT-qPCR for <i>Smarcc1</i> |

|                               |                                    |                                           |                                            |
|-------------------------------|------------------------------------|-------------------------------------------|--------------------------------------------|
| <i>Smarcd1</i> F              | GATCTGTTTC<br>CGAGCGAGAGTT         | 85,158,626<br>chr15:99,538,193-99,539,785 | RT-qPCR for <i>Smarcd1</i>                 |
| <i>Smarcd1</i> R              | TGTTCTCTGT<br>GGGTCTTCAGAG         | chr15:99,538,193-99,539,785               | RT-qPCR for <i>Smarcd1</i>                 |
| W-chr3:63099200-63099290 F    | TGTCATCCAC<br>ACACGGTGTGAC         | chr3:63,099,355-63,099,417                | RT-qPCR for DHS W-chr3:63099200-63099290   |
| W-chr3:63099200-63099290 R    | AGAGCAGTTCCC<br>TGGGTGAC           | chr3:63,099,355-63,099,417                | RT-qPCR for DHS W-chr3:63099200-63099290   |
| C-chr3:63099200-63099290 F    | GAGGAGAGGAG<br>GGAAGGATG           | chr3:63,099,070-63,099,155                | RT-qPCR for DHS C-chr3:63099200-63099290   |
| C-chr3:63099200-63099290 R    | TCTTGCTCTCTCC<br>GTTTTCC           | chr3:63,099,070-63,099,155                | RT-qPCR for DHS C-chr3:63099200-63099290   |
| W-chr12:112640141-112640291 F | CTCTCAGGACGA<br>AGCCTCAG           | chr12:112,640,255-112,640,317             | RT-qPCR for DHS W-12:112640141-112640291   |
| W-12:112640141-112640291 R    | TAGCTGCCATCC<br>AAGGTGTT           | chr12:112,640,255-112,640,317             | RT-qPCR for DHS W-12:112640141-112640291   |
| W-chr16:32502840-32502990 F   | AGTGGAATTAGC<br>ATCAAATATAAT<br>CA | chr16:32,502,961-32,503,020               | RT-qPCR for DHS W-chr16:32502840-32502990  |
| W-chr16:32502840-32502990 R   | TGTATAGAGGAT<br>TGTTGAGGATGG       | chr16:32,502,961-32,503,020               | RT-qPCR for DHS W-chr16:32502840-32502990  |
| C-chr5:20216700-20216850 F    | CATTCCTGCCAA<br>TTCATCCT           | chr5:20,216,697-20,216,760                | RT-qPCR for DHS C-chr5:20216700-20216850   |
| C-chr5:20216700-20216850 R    | ACCCTATCCTGC<br>GTGTCATC           | chr5:20,216,697-20,216,760                | RT-qPCR for DHS C-chr5:20216700-20216850   |
| C-chr3:34627320-34627470 F    | CCTCTCCACATC<br>ATGCCAAG           | chr3:34,627,189-34,627,248                | RT-qPCR for DHS C-chr3:34627320-34627470   |
| C-chr3:34627320-34627470 R    | GGTTTCAGGGTC<br>TTTTCTTTTG         | chr3:34,627,189-34,627,248                | RT-qPCR for DHS C-chr3:34627320-34627470   |
| W-chr9:63651140-63651290 F    | CCCTGTGAATAG<br>TGGGAAA            | chr9:63,651,371-63,651,436                | RT-qPCR for DHS W-chr9:63651140-63651290   |
| W-chr9:63651140-63651290 R    | GAAGGCAGAGAT<br>GGGAAATG           | chr9:63,651,371-63,651,436                | RT-qPCR for DHS W-chr9:63651140-63651290   |
| W-chr4:153479800-153479950 F  | GGTTTGTGGCAC<br>GCATCTA            | chr4:153,480,060-153,480,139              | RT-qPCR for DHS W-chr4:153479800-153479950 |

|                              |                            |                              |                                            |
|------------------------------|----------------------------|------------------------------|--------------------------------------------|
| W-chr4:153479800-153479950 R | TACTGGCCCTCT<br>CAGCTTGT   | chr4:153,480,060-153,480,139 | RT-qPCR for DHS W-chr4:153479800-153479950 |
| C-chr16:94534280-94534430 F  | TTGGGGACTGAA<br>CCTAGTCCT  | chr16:94,534,037-94,534,100  | RT-qPCR for DHS C-chr16:94534280-94534430  |
| C-chr16:94534280-94534430 F  | AACCTGGGGTTT<br>ATCTTTAGCC | chr16:94,534,037-94,534,100  | RT-qPCR for DHS C-chr16:94534280-94534430  |
| <i>as-Klf11</i> F            | CTGCGGATTTGC<br>TCTGGT     | chr12:25,336,505-25,336,654  | RT-qPCR for antisense transcript           |
| <i>as-Klf11</i> R            | TGACGTCATGGC<br>TGGAAATA   | chr12:25,336,505-25,336,654  | RT-qPCR for antisense transcript           |
| <i>as-Klf11</i> as           | TCCCATCTAGTTC<br>CCCCAAT   | chr12:25,336,787             | primer for antisense cDNA production       |
| <i>as-Klf11</i> s            | TAAGTGACGGGG<br>CTGAGCGC   | chr12:25,336,434             | primer for sense cDNA production           |
| <i>as-Fam155a</i> F          | TCCCCTCCTCCT<br>CTCCTC     | chr8:9,771,521-9,771,622     | RT-qPCR for antisense transcript           |
| <i>as-Fam155a</i> R          | GAGAGCCAGCGC<br>GAAGTAG    | chr8:9,771,521-9,771,622     | RT-qPCR for antisense transcript           |
| <i>as-Fam155a</i> as         | CTTCCGACCTAA<br>GCATCAGC   | chr8:9,779,210               | primer for antisense cDNA production       |
| <i>as-Fam155a</i> s          | AAGATGGCGGCA<br>ACTTAGC    | chr8:9,778,628               | primer for sense cDNA production           |
| <i>as-Echdc1</i> F           | GTGTGGAAGCCG<br>GAAGAG     | chr10:29,033,068-29,033,159  | RT-qPCR for antisense transcript           |
| <i>as-Echdc1</i> R           | AGCCCCTGGCTC<br>TGACTT     | chr10:29,033,068-29,033,159  | RT-qPCR for antisense transcript           |
| <i>as-Echdc1</i> as          | GAGGGGGAGGG<br>GACATCT     | chr10:290,33,202             | primer for antisense cDNA production       |
| <i>as-Echdc1</i> s           | CGCCAGAGTTCC<br>TTCAGCTA   | chr10:29,032,986             | primer for sense cDNA production           |
| <i>as-Gtf3c6</i> F           | GGCTGGCAACGC<br>TAAACTAA   | chr10:39,978,255-39,978,387  | RT-qPCR for antisense transcript           |
| <i>as-Gtf3c6</i> R           | CTTCACGCTCAG<br>GAAAGGAC   | chr10:39,978,255-39,978,387  | RT-qPCR for antisense transcript           |
| <i>as-Rps29</i> F            | GGAGTTCTGGGC<br>TGTAGTGC   | chr12:70,260,354-70,260,498  | RT-qPCR for antisense transcript           |

|                               |                           |                                   |                                         |
|-------------------------------|---------------------------|-----------------------------------|-----------------------------------------|
| <i>as-Rps29</i> R             | GTTTTGACCTGC<br>TCCGTTTC  | chr12:70,260,354-<br>70,260,498   | RT-qPCR for antisense<br>transcript     |
| <i>as-Ttc25</i> F             | TTCTTGGCTTGCT<br>TTGTCTG  | chr11:100,406,770-<br>100,406,854 | RT-qPCR for antisense<br>transcript     |
| <i>as-Ttc25</i> R             | TCCAGAGTGATC<br>GCTGTTTG  | chr11:100,406,770-<br>100,406,854 | RT-qPCR for antisense<br>transcript     |
| <i>as-Ttc25</i> as            | TCAGACAAGTGC<br>TGAGCGCG  | chr11:100,406,883                 | primer for antisense<br>cDNA production |
| <i>as-Ttc25</i> s             | TCCTAATGGGAC<br>CTGGAGTG  | chr11:100,406,707                 | primer for sense cDNA<br>production     |
| <i>as-Mcm5</i> F              | ACTTGCGATCCT<br>CCTGCTTA  | chr8:77,633,101-<br>77,633,179    | RT-qPCR for antisense<br>transcript     |
| <i>as-Mcm5</i> R              | CCTTCGGAGAAA<br>ACCTAGCC  | chr8:77,633,101-<br>77,633,179    | RT-qPCR for antisense<br>transcript     |
| <i>as-Mcm5</i> as             | ATTTTGTGAGGC<br>TGGACGTT  | chr8:77,633,267                   | primer for antisense<br>cDNA production |
| <i>as-Mcm5</i> s              | AGAGGCCAGGAG<br>AGGACATT  | chr8:77,632,910                   | primer for sense cDNA<br>production     |
| <i>as-Med22</i> F             | AGAGTCCGAAGT<br>GGGTCCTT  | chr2:26,766,219-<br>26,766,318    | RT-qPCR for antisense<br>transcript     |
| <i>as-Med22</i> R             | AGGGAATTGTGG<br>GGGATAAG  | chr2:26,766,219-<br>26,766,318    | RT-qPCR for antisense<br>transcript     |
| <i>as-Fam46d</i> F            | AGTGAGTCGCTT<br>CGGTTAGG  | chrX:105,011,709-<br>105,011,771  | RT-qPCR for antisense<br>transcript     |
| <i>as-Fam46d</i> R            | CTTCAGCTCTCG<br>GACTCCAC  | chrX:105,011,709-<br>105,011,771  | RT-qPCR for antisense<br>transcript     |
| <i>as-Ssr4</i> F              | GGGTATGGGTTG<br>AGAAAACG  | chrX:71,032,271-<br>71,032,330    | RT-qPCR for antisense<br>transcript     |
| <i>as-Ssr4</i> R              | GCGTAAGAACCG<br>GTGTGACT  | chrX:71,032,271-<br>71,032,330    | RT-qPCR for antisense<br>transcript     |
| <i>as-1110038D17Rik</i><br>F  | CCTTCCACCCCC<br>ACTTCT    | chr10:74,980,179-<br>74,980,239   | RT-qPCR for antisense<br>transcript     |
| <i>as-1110038D17Rik</i><br>R  | GAGCGTTTCAGG<br>GAAGGAC   | chr10:74,980,179-<br>74,980,239   | RT-qPCR for antisense<br>transcript     |
| <i>as-1110038D17Rik</i><br>as | GCCTAATCCCTT<br>CCAGGTCT  | chr10:74,980,460                  | primer for antisense<br>cDNA production |
| <i>as-1110038D17Rik</i> s     | GGAGAACCAGAG<br>CTTCCATCT | chr10:74,980,658                  | primer for sense cDNA<br>production     |

|                        |                            |                                  |                                         |
|------------------------|----------------------------|----------------------------------|-----------------------------------------|
| <i>as-Trappc9</i> F    | GAAACAAGCACA<br>CTCCCAGTC  | chr15:72,894,962-<br>72,895,036  | RT-qPCR for antisense<br>transcript     |
| <i>as-Trappc9</i> R    | GGTCAAGGGGCT<br>CCATCTA    | chr15:72,894,962-<br>72,895,036  | RT-qPCR for antisense<br>transcript     |
| <i>as-Trappc9</i> as   | CGAAGAGCGCAG<br>AAACCTT    | chr15:72,898,600                 | primer for antisense<br>cDNA production |
| <i>as-Trappc9</i> s    | GGCCCACTCTGG<br>TGTTTCT    | chr15:72,897,099                 | primer for sense cDNA<br>production     |
| <i>as-Napepld</i> F    | CACTGTGGGTGT<br>TTGTGAGC   | chr5:21,201,414-<br>21,201,503   | RT-qPCR for antisense<br>transcript     |
| <i>as-Napepld</i> R    | GGCTCAGCAGGT<br>AAGAGCAC   | chr5:21,201,414-<br>21,201,503   | RT-qPCR for antisense<br>transcript     |
| <i>as-St6galnac6</i> F | CCTACACATAGG<br>TCCACACACA | chr2:32,463,313-<br>32,460,642   | RT-qPCR for antisense<br>transcript     |
| <i>as-St6galnac6</i> R | CCAAGTGCTGGG<br>ATTAAAGG   | chr2:-32,463,313-<br>32,460,642  | RT-qPCR for antisense<br>transcript     |
| <i>as-Eya3</i> F       | AGTTCCCGACGG<br>CTCTGAT    | chr4:132,478,569-<br>132,478,652 | RT-qPCR for antisense<br>transcript     |
| <i>as-Eya3</i> R       | GCGTGACTGCGC<br>TTTACATA   | chr4:132,478,569-<br>132,478,652 | RT-qPCR for antisense<br>transcript     |
| <i>as-Plod1</i> F      | CCCCGCTTCTCT<br>CCAAGT     | chr4:147,311,018-<br>147,311,097 | RT-qPCR for antisense<br>transcript     |
| <i>as-Plod1</i> R      | ATCGCGGTGCAG<br>ATGATATT   | chr4:147,311,018-<br>147,311,097 | RT-qPCR for antisense<br>transcript     |
| <i>as-Plod1</i> as     | GGGAAGGGTTTT<br>CCTGCTTA   | chr4:147,313,950                 | primer for antisense<br>cDNA production |
| <i>as-Plod1</i> s      | ACCATCACCACA<br>CACACACA   | chr4:147,313,644                 | primer for sense cDNA<br>production     |
| <i>as-Parp4</i> F      | CCCCTTTGGGAA<br>ATTTGTTT   | chr14:57,194,157-<br>57,194,250  | RT-qPCR for antisense<br>transcript     |
| <i>as-Parp4</i> R      | GGATGGGGACTT<br>TTGACAGA   | chr14:57,194,157-<br>57,194,250  | RT-qPCR for antisense<br>transcript     |
| <i>as-Zfp62</i> F      | TCAGCTTCACAA<br>GCAGGAAG   | chr11:49,016,720-<br>49,016,829  | RT-qPCR for antisense<br>transcript     |
| <i>as-Zfp62</i> R      | GGGGTTCTAGT<br>TGTCTTGA    | chr11:49,016,720-<br>49,016,829  | RT-qPCR for antisense<br>transcript     |
| <i>as-Mrps15</i> F     | GCTGGGATTTGA<br>ACTCAGGA   | chr4:125,723,694-<br>125,723,755 | RT-qPCR for antisense<br>transcript     |

|                       |                                    |                                   |                                                    |
|-----------------------|------------------------------------|-----------------------------------|----------------------------------------------------|
| <i>as-Mrps15</i> R    | AAATGGCTCAGC<br>GGTTAAGA           | chr4:125,723,694-<br>125,723,755  | RT-qPCR for antisense<br>transcript                |
| <i>as-Cyp2d34</i> F   | CCACCAACCTCA<br>TTCCTTTG           | chr15:82,451,437-<br>82,451,541   | RT-qPCR for antisense<br>transcript                |
| <i>as-Cyp2d34</i> R   | ATGTTTCAGCCCA<br>GCAGAATC          | chr15:82,451,437-<br>82,451,541   | RT-qPCR for antisense<br>transcript                |
| <i>as-Gdf6</i> F      | GGTCCCTGGAGA<br>AGTTTCGAG          | chr4:9,771,174-<br>9,771,268      | RT-qPCR for antisense<br>transcript                |
| <i>as-Gdf6</i> R      | CCTCTGTCCCAG<br>GGTTGG             | chr4:9,771,174-<br>9,771,268      | RT-qPCR for antisense<br>transcript                |
| <i>as-Tas2r140</i> F  | GCACACACAACA<br>GCCAGAAG           | chr6:133,006,040-<br>133,006,127  | RT-qPCR for antisense<br>transcript                |
| <i>as-Tas2r140</i> R  | TTGGAGTATCTTT<br>GTTTTGCTGA        | chr6:133,006,040-<br>133,006,127  | RT-qPCR for antisense<br>transcript                |
| <i>as-Tas2r140</i> as | ACCAGGAGATGC<br>TCCAAGTC           | chr6:133,006,488                  | primer for antisense<br>cDNA production            |
| <i>as-Tas2r140</i> s  | TGAAAATAAGATA<br>AGGTCACCTAAC<br>A | chr6:133,006,029                  | primer for sense cDNA<br>production                |
| <i>Arih2</i> F        | CAGGTCAAGCCA<br>GACCAAAC           | chr9:108,551,604-<br>108,551,700  | ChIP-qPCR primer for +1<br>nucleosome confirmation |
| <i>Arih2</i> R        | CTCTGCCGGAGG<br>AAGCTG             | chr9:108,551,604-<br>108,551,700  | ChIP-qPCR primer for +1<br>nucleosome confirmation |
| <i>Ywhaz</i> F        | ACCGACCCTTTT<br>AGGTCCTG           | chr15:36,724,210-<br>36,724,272   | ChIP-qPCR primer for +1<br>nucleosome confirmation |
| <i>Ywhaz</i> R        | CAGCTAGAGCCC<br>TAGGAACG           | chr15:36,724,210-<br>36,724,272   | ChIP-qPCR primer for +1<br>nucleosome confirmation |
| <i>Ppm1j</i> F        | ATCTGCCCAACG<br>CTACCTC            | chr3:104,584,084-<br>104,584,146  | ChIP-qPCR primer for +1<br>nucleosome confirmation |
| <i>Ppm1j</i> R        | TCTCCCGGGAAC<br>TCTTAGGT           | chr3:104,584,084-<br>104,584,146  | ChIP-qPCR primer for +1<br>nucleosome confirmation |
| <i>Expi</i> F         | CCAGTCAGAGCC<br>AACATGAA           | chr11:83,522,605-<br>83,522,693   | ChIP-qPCR primer for +1<br>nucleosome confirmation |
| <i>Expi</i> R         | TTAGACAGAGCC<br>CAGGCAGT           | chr11:83,522,605-<br>83,522,693   | ChIP-qPCR primer for +1<br>nucleosome confirmation |
| <i>Traf3ip3</i> F     | GTTATTTTCGCAC<br>AGCAGCA           | chr1:195,027,639-<br>195,027,728  | ChIP-qPCR primer for +1<br>nucleosome confirmation |
| <i>Traf3ip3</i> R     | TCAAATTGCTAAG<br>GGCAAGG           | chr1:195,027,639-<br>195,027,728  | ChIP-qPCR primer for +1<br>nucleosome confirmation |
| <i>Coasy</i> F        | CGGTTTCAGCCTA<br>ACAAGAGG          | chr11:100,944,103-<br>100,944,168 | ChIP-qPCR primer for +1<br>nucleosome confirmation |
| <i>Coasy</i> R        | CCAGGAACCCCT                       | chr11:100,944,103-                | ChIP-qPCR primer for +1                            |



|                   |                           |                                  |                                                         |
|-------------------|---------------------------|----------------------------------|---------------------------------------------------------|
|                   | GAGTCAT                   | 100,944,168                      | nucleosome confirmation                                 |
| <i>Cd48</i> F     | AAAACAGGGATG<br>GTGTCTGG  | chr1:173,612,236-<br>173,612,296 | ChIP-qPCR primer for +1<br>nucleosome confirmation      |
| <i>Cd48</i> R     | TTGAAATCCAGTT<br>CCCAAGG  | chr1:173,612,236-<br>173,612,296 | ChIP-qPCR primer for +1<br>nucleosome confirmation      |
| <i>Dad1</i> F     | CGAGGAGACAGT<br>AGCCGAAC  | chr14:54,873,376-<br>54,873,446  | ChIP-qPCR primer for +1<br>nucleosome confirmation      |
| <i>Dad1</i> R     | GAAGTTGCTGGA<br>CGCCTATC  | chr14:54,873,376-<br>54,873,446  | ChIP-qPCR primer for +1<br>nucleosome confirmation      |
| <i>Acot7</i> F    | GCTGGGACAGAC<br>AAGAGGTC  | chr4:151,559,714-<br>151,559,776 | MNase-qPCR primer for<br>NDR nucleosome<br>confirmation |
| <i>Acot7</i> R    | TCCCTCCCATA<br>GCTCCTAC   | chr4:151,559,714-<br>151,559,776 | MNase-qPCR primer for<br>NDR nucleosome<br>confirmation |
| <i>Rin2</i> F     | CTCTTGCAACCAG<br>GTGTGTGT | chr2:145,611,255-<br>145,611,317 | MNase-qPCR primer for<br>NDR nucleosome<br>confirmation |
| <i>Rin2</i> R     | CACCCTGCAAAG<br>ACTTCCAT  | chr2:145,611,255-<br>145,611,317 | MNase-qPCR primer for<br>NDR nucleosome<br>confirmation |
| <i>Zwilch</i> F   | TCACGCTTTAAGT<br>TCGGTTTG | chr9:64,020,774-<br>64,020,877   | MNase-qPCR primer for<br>NDR nucleosome<br>confirmation |
| <i>Zwilch</i> R   | CCCCTAACAGAA<br>ATGGGAGA  | chr9:64,020,774-<br>64,020,877   | MNase-qPCR primer for<br>NDR nucleosome<br>confirmation |
| <i>Pank1</i> F    | GGTCTGAAGGGA<br>GGGAAGAG  | chr19:34,953,947-<br>34,954,036  | MNase-qPCR primer for<br>NDR nucleosome<br>confirmation |
| <i>Pank1</i> R    | GAGTGTGCCAAC<br>CAAGGAAT  | chr19:34,953,947-<br>34,954,036  | MNase-qPCR primer for<br>NDR nucleosome<br>confirmation |
| <i>Rnaseh2b</i> F | AGCCAATTTGAA<br>GGCTGCT   | chr14:62,950,721-<br>62,950,824  | MNase-qPCR primer for<br>NDR nucleosome<br>confirmation |
| <i>Rnaseh2b</i> R | TGTGGAGCTCCT<br>CGTTTTTC  | chr14:62,950,721-<br>62,950,824  | MNase-qPCR primer for<br>NDR nucleosome<br>confirmation |
| <i>Grhl2</i> F    | GTCAGCTCGCAG<br>AGTCTCCA  | chr15:37,162,616-<br>37,162,689  | MNase-qPCR primer for<br>NDR nucleosome<br>confirmation |
| <i>Grhl2</i> R    | CTCCAAGTGCAG<br>GTCACTCA  | chr15:37,162,616-<br>37,162,689  | MNase-qPCR primer for<br>NDR nucleosome<br>confirmation |
| <i>Olf1450</i> F  | GCCTTATGCAGT<br>CTGGGAAA  | chr19:13,027,996-<br>13,028,099  | MNase-qPCR primer for<br>NDR nucleosome<br>confirmation |
| <i>Olf1450</i> R  | TGCTGTTGGCCA<br>CATACATT  | chr19:13,027,996-<br>13,028,099  | MNase-qPCR primer for<br>NDR nucleosome<br>confirmation |

|                   |                           |                                   |                                                         |
|-------------------|---------------------------|-----------------------------------|---------------------------------------------------------|
| <i>Cd5l</i> F     | CAGTCACCTCCC<br>TTCCTCTG  | chr3:87,161,725-<br>87,161,789    | MNase-qPCR primer for<br>NDR nucleosome<br>confirmation |
| <i>Cd5l</i> R     | AGGGGGTGGGA<br>CTGATAGAG  | chr3:87,161,725-<br>87,161,789    | MNase-qPCR primer for<br>NDR nucleosome<br>confirmation |
| <i>Serpina6</i> F | AAGCATCAACCA<br>ATGGGAAG  | chr12:104,895,423-<br>104,895,499 | MNase-qPCR primer for<br>NDR nucleosome<br>confirmation |
| <i>Serpina6</i> R | CATGCAATGTCG<br>AGCTGATT  | chr12:104,895,423-<br>104,895,499 | MNase-qPCR primer for<br>NDR nucleosome<br>confirmation |
| <i>Mrps15</i> F   | AACTCCAGAAC<br>AGGGCATC   | chr4:125,723,636-<br>125,723,707  | ChIP-qPCR primer for -1<br>nucleosome confirmation      |
| <i>Mrps15</i> R   | GTTCAAATCCCA<br>GCAACCAC  | chr4:125,723,636-<br>125,723,707  | ChIP-qPCR primer for -1<br>nucleosome confirmation      |
| <i>Ednrb</i> F    | TTTGGGGAAGTT<br>GTCTTTCG  | chr14:104,243,885-<br>104,243,974 | ChIP-qPCR primer for -1<br>nucleosome confirmation      |
| <i>Ednrb</i> R    | CCTGCATGCTGG<br>CTTAAAAC  | chr14:104,243,885-<br>104,243,974 | ChIP-qPCR primer for -1<br>nucleosome confirmation      |
| <i>Pak6</i> F     | CCCGACGATATC<br>AAAATTGC  | chr2:118,488,983-<br>118,489,081  | ChIP-qPCR primer for -1<br>nucleosome confirmation      |
| <i>Pak6</i> R     | GCTCACTTTGGG<br>ATTTCTCC  | chr2:118,488,983-<br>118,489,081  | ChIP-qPCR primer for -1<br>nucleosome confirmation      |
| <i>Grip1</i> F    | ATCTCTCGCCTTT<br>CCTGTGA  | chr10:119,256,137-<br>119,256,216 | ChIP-qPCR primer for -1<br>nucleosome confirmation      |
| <i>Grip1</i> R    | CTGTGCATTCTA<br>GCCAGTGC  | chr10:119,256,137-<br>119,256,216 | ChIP-qPCR primer for -1<br>nucleosome confirmation      |
| <i>Rab38</i> F    | GGGAGGCGAGA<br>GAAAAATCT  | chr7:95,578,600-<br>95,578,674    | ChIP-qPCR primer for -1<br>nucleosome confirmation      |
| <i>Rab38</i> R    | CCAGTGCTACTG<br>CCTGTCAA  | chr7:95,578,600-<br>95,578,674    | ChIP-qPCR primer for -1<br>nucleosome confirmation      |
| <i>Ift74</i> F    | GGGTTCGATTGG<br>AACTAGCA  | chr4:94,280,670-<br>94,280,742    | ChIP-qPCR primer for -1<br>nucleosome confirmation      |
| <i>Ift74</i> R    | GATTGCATTGGT<br>TCCTCCAG  | chr4:94,280,670-<br>94,280,742    | ChIP-qPCR primer for -1<br>nucleosome confirmation      |
| <i>Ghr</i> F      | ATAGGCTGGCCT<br>CAAACCTCA | chr15:3,421,886-<br>3,421,960     | ChIP-qPCR primer for -1<br>nucleosome confirmation      |
| <i>Ghr</i> R      | TGGTGTGGTAC<br>ACCCCTTT   | chr15:3,421,886-<br>3,421,960     | ChIP-qPCR primer for -1<br>nucleosome confirmation      |
| <i>Trp53i11</i> F | AGGCATGGGACA<br>GGTTGTAG  | chr2:93,026,961-<br>93,027,037    | ChIP-qPCR primer for -1<br>nucleosome confirmation      |

|                                       |                           |                                   |                                                                           |
|---------------------------------------|---------------------------|-----------------------------------|---------------------------------------------------------------------------|
| <i>Trip53i11</i> R                    | CCAAGAGAGAGT<br>CCCAGGTG  | chr2:93,026,961-<br>93,027,037    | ChIP-qPCR primer for -1<br>nucleosome confirmation                        |
| <i>Arhgap15</i> F                     | GGCATTCTGAGC<br>AACTCTCC  | chr2:43,603,771-<br>43,603,843    | ChIP-qPCR primer for -1<br>nucleosome confirmation                        |
| <i>Arhgap15</i> R                     | TGCAGATGCACC<br>AGAACTTT  | chr2:43,603,771-<br>43,603,843    | ChIP-qPCR primer for -1<br>nucleosome confirmation                        |
| <i>Zfp595</i> F                       | TTGTCTTGCAGC<br>ATCTCAGG  | chr13:67,433,912-<br>67,433,993   | ChIP-qPCR primer for -1<br>nucleosome confirmation                        |
| <i>Zfp595</i> R                       | GCAGTGCTCAGA<br>AACCACCT  | chr13:67,433,912-<br>67,433,993   | ChIP-qPCR primer for -1<br>nucleosome confirmation                        |
| C-chr5:119290080-<br>119290230 F      | GCTGTGACAGAA<br>TGCCTGAA  | chr5:119,289,895-<br>119,289,971  | ChIP-qPCR primer for<br>flanking DHS nucleosome<br>occupancy confirmation |
| C-chr5:119290080-<br>119290230 R      | GCCACCATGGAC<br>TGAAACT   | chr5:119,289,895-<br>119,289,971  | ChIP-qPCR primer for<br>flanking DHS nucleosome<br>occupancy confirmation |
| W-chr5:119290080-<br>119290230 F      | GTGCTGAGGAGG<br>TCAAAGG   | chr5:119,290,286-<br>119,290,359  | ChIP-qPCR primer for<br>flanking DHS nucleosome<br>occupancy confirmation |
| W-chr5:119290080-<br>119290230 R      | CACGGTGATTCA<br>CAACTGCT  | chr5:119,290,286-<br>119,290,359  | ChIP-qPCR primer for<br>flanking DHS nucleosome<br>occupancy confirmation |
| C-chr3:30600200-<br>30600350 F        | CCCGCTCTGCAA<br>AACATAGT  | chr3:30,599,981-<br>30,600,050    | ChIP-qPCR primer for<br>flanking DHS nucleosome<br>occupancy confirmation |
| C-chr3:30600200-<br>30600350 R        | TCTCACCGGTGC<br>TGTGTTAC  | chr3:30,599,981-<br>30,600,050    | ChIP-qPCR primer for<br>flanking DHS nucleosome<br>occupancy confirmation |
| W-chr3:30600200-<br>30600350 F        | TGGCTCTAAGCT<br>GAGAAGTGG | chr3:30,600,502-<br>30,600,576    | ChIP-qPCR primer for<br>flanking DHS nucleosome<br>occupancy confirmation |
| W-chr3:30600200-<br>30600350 R        | TTGTGGAGAGTC<br>CTCAGGAAG | chr3:30,600,502-<br>30,600,576    | ChIP-qPCR primer for<br>flanking DHS nucleosome<br>occupancy confirmation |
| W-chr12:78090160-<br>78090310 F       | TCTCCATCAGATT<br>GGCTGGT  | chr12:78,090,519-<br>78,090,589   | ChIP-qPCR primer for<br>flanking DHS nucleosome<br>occupancy confirmation |
| W-chr12:78090160-<br>78090310 R       | GGCCCTTTCTCC<br>ATCAATTA  | chr12:78,090,519-<br>78,090,589   | ChIP-qPCR primer for<br>flanking DHS nucleosome<br>occupancy confirmation |
| W-<br>chr11:117495120-<br>117495270 F | GATCAGGCGTTG<br>GTAGAGGA  | chr11:117,495,423-<br>117,495,502 | ChIP-qPCR primer for<br>flanking DHS nucleosome<br>occupancy confirmation |
| W-<br>chr11:117495120-<br>117495270 R | GGTCATCGGCTT<br>AAGTTCCA  | chr11:117,495,423-<br>117,495,502 | ChIP-qPCR primer for<br>flanking DHS nucleosome<br>occupancy confirmation |
| W-chr10:95182920-<br>95183070 F       | CATGGCTGTTTC<br>CTTGACCT  | chr10:95,183,146-<br>95,183,240   | ChIP-qPCR primer for<br>flanking DHS nucleosome<br>occupancy confirmation |
| W-chr10:95182920-                     | TAAGGCGAGACC              | chr10:95,183,146-                 | ChIP-qPCR primer for                                                      |

|                              |                            |                              |                                                                     |
|------------------------------|----------------------------|------------------------------|---------------------------------------------------------------------|
| 95183070 R                   | ACACTGAG                   | 95,183,240                   | flanking DHS nucleosome occupancy confirmation                      |
| C-chr11:69388860-69389010 F  | AGAAGCGGACAG<br>TCCAGAAG   | chr11:69,388,677-69,388,764  | ChIP-qPCR primer for flanking DHS nucleosome occupancy confirmation |
| C-chr11:69388860-69389010 R  | CCCTGGCTGGAA<br>TTCATAT    | chr11:69,388,677-69,388,764  | ChIP-qPCR primer for flanking DHS nucleosome occupancy confirmation |
| W-chr11:69388860-69389010 F  | CGGTAGAGCCAG<br>CAGATAGG   | chr11:69,389,098-69,389,168  | ChIP-qPCR primer for flanking DHS nucleosome occupancy confirmation |
| W-chr11:69388860-69389010 R  | AGGCTGGCTTCA<br>AACTCAA    | chr11:69,389,098-69,389,168  | ChIP-qPCR primer for flanking DHS nucleosome occupancy confirmation |
| W-chr3:121272780-121272930 F | TGCTAACCCCTTT<br>CCTGATG   | chr3:121,273,027-121,273,121 | ChIP-qPCR primer for flanking DHS nucleosome occupancy confirmation |
| W-chr3:121272780-121272930 R | TAGCACAGCCCA<br>GACAGAGA   | chr3:121,273,027-121,273,121 | ChIP-qPCR primer for flanking DHS nucleosome occupancy confirmation |
| C-chr1:8087320-8087470 F     | CAGGCTGGTTCA<br>GACTCCAT   | chr1:8,087,181-8,087,275     | ChIP-qPCR primer for flanking DHS nucleosome occupancy confirmation |
| C-chr1:8087320-8087470 R     | CAGTGGTAGGTG<br>GCAGAACA   | chr1:8,087,181-8,087,275     | ChIP-qPCR primer for flanking DHS nucleosome occupancy confirmation |
| chr13:58659000-58659150 F    | ATGGGTGTGGTC<br>TTCATGCT   | chr13:58,659,037-58,659,116  | MNase-qPCR primer for DHS nucleosome occupancy confirmation         |
| chr13:58659000-58659150 R    | GCAGACAGGCAG<br>AGAGTGTG   | chr13:58,659,037-58,659,116  | MNase-qPCR primer for DHS nucleosome occupancy confirmation         |
| chr12:78090160-78090310 F    | GGCTACAGCGTA<br>AGGACTCG   | chr12:78,090,193-78,090,286  | MNase-qPCR primer for DHS nucleosome occupancy confirmation         |
| chr12:78090160-78090310 R    | TTGTTCTCGGAG<br>GGCTTTTA   | chr12:78,090,193-78,090,286  | MNase-qPCR primer for DHS nucleosome occupancy confirmation         |
| chr19:25561180-25561329 F    | TGACCTTATCCG<br>AGCCTCAC   | chr19:25,561,181-25,561,257  | MNase-qPCR primer for DHS nucleosome occupancy confirmation         |
| chr19:25561180-25561329 R    | CCTCCAGGTCTT<br>TGTTACAGC  | chr19:25,561,181-25,561,257  | MNase-qPCR primer for DHS nucleosome occupancy confirmation         |
| chr4:141101000-141101150 F   | TTCTACCTCTAGC<br>CTGGCTTTC | chr4:141,101,001-141,101,071 | MNase-qPCR primer for DHS nucleosome occupancy confirmation         |
| chr4:141101000-141101150 R   | GGTGGGAACCAT<br>GAGCTG     | chr4:141,101,001-141,101,071 | MNase-qPCR primer for DHS nucleosome occupancy confirmation         |
| chr16:75139620-75139770 F    | GCTTGTGAAGCG<br>TCTCCTTT   | chr16:75,139,677-75,139,756  | MNase-qPCR primer for DHS nucleosome occupancy confirmation         |
| chr16:75139620-75139770 R    | AGCCCTGTAAGC<br>CTCCTGAT   | chr16:75,139,677-75,139,756  | MNase-qPCR primer for DHS nucleosome occupancy confirmation         |

|                           |                                      |                               |                                                                                    |
|---------------------------|--------------------------------------|-------------------------------|------------------------------------------------------------------------------------|
| chr15:93432000-93432150 F | TCACGTGACATC<br>TTTGCAAGTC           | chr15:93,432,078-93,432,147   | MNase-qPCR primer for DHS nucleosome occupancy confirmation                        |
| chr15:93432000-93432150 R | AACCGTCAATGG<br>ACAAATCC             | chr15:93,432,078-93,432,147   | MNase-qPCR primer for DHS nucleosome occupancy confirmation                        |
| chr15:25765000-25765150 F | AGCTCCTCCCTC<br>CTCATTGT             | chr15:25,765,042-25,765,137   | MNase-qPCR primer for DHS nucleosome occupancy confirmation                        |
| chr15:25765000-25765150 R | CCCACAGAGCAT<br>CCTGACTT             | chr15:25,765,042-25,765,137   | MNase-qPCR primer for DHS nucleosome occupancy confirmation                        |
| chr4:53328640-53328790 F  | CAACAGGGGTCT<br>CCTTAGCA             | chr4:53,328,690-53,328,773    | MNase-qPCR primer for DHS nucleosome occupancy confirmation (control)              |
| chr4:53328640-53328790 R  | CTCAGGACACTG<br>CAGGATGA             | chr4:53,328,690-53,328,773    | MNase-qPCR primer for DHS nucleosome occupancy confirmation (control)              |
| chr1:51798280-51798430 F  | GCTGAAGGACAG<br>GCTTAACG             | chr1:51,798,336-51,798,411    | MNase-qPCR primer for DHS nucleosome occupancy confirmation (control)              |
| chr1:51798280-51798430 R  | CTTGCAAACGTTT<br>TTCAGCA             | chr1:51,798,336-51,798,411    | MNase-qPCR primer for DHS nucleosome occupancy confirmation (control)              |
| chr17:88371160-88371310 F | TACCTTTCCAGC<br>CCCAGAGT             | chr17:88,371,163-88,371,262   | MNase-qPCR primer for DHS nucleosome occupancy confirmation (control)              |
| chr17:88371160-88371310 R | CTCCCAACACTG<br>CCTCAGTT             | chr17:88,371,163-88,371,262   | MNase-qPCR primer for DHS nucleosome occupancy confirmation (control)              |
| <i>Ttc25</i> Guide -      | AAACCGTGGAAA<br>GCCTCGCAGACA<br>C    |                               | Guide sequence to be cloned into the pX330 CRISPR Cas9 plasmid                     |
| <i>Ttc25</i> Guide +      | CACCGTGTCTGC<br>GAGGCTTTCCAC<br>G    |                               | Guide sequence to be cloned into the pX330 CRISPR Cas9 plasmid                     |
| <i>Ttc25</i> Targ F       | CTGGCTCAGCTG<br>AATTCTGGA            | chr11:100,405,951-100,407,440 | Forward primer to amplify <i>Ttc25</i> 1.5kb sequence to clone into pBluescript    |
| <i>Ttc25</i> Targ R       | ggatccTAGGGGTA<br>GTTTCGAGACCAC<br>C | chr11:100,405,951-100,407,440 | Reverse primer to amplify <i>Ttc25</i> 1.5kb sequence to clone into pBluescript    |
| <i>Ttc25</i> Check F      | CCCACAGCCATT<br>ACTCCTGAA            | chr11:100,406,404-100,406,905 | Forward primer to check transfected clones for super-binder nucleosome integration |

|                                                         |                              |                                   |                                                                                    |
|---------------------------------------------------------|------------------------------|-----------------------------------|------------------------------------------------------------------------------------|
| <i>Ttc25</i> Check R                                    | CCGGTCAGACAA<br>GTGCTGAG     | chr11:100,406,404-<br>100,406,905 | Reverse primer to check transfected clones for super-binder nucleosome integration |
| Superbinder nucleosome F                                | GCCTTAATCGGT<br>CGTAGCAC     | n/a                               | ChIP-qPCR primer to check histone occupancy over superbinder position              |
| Superbinder nucleosome R                                | CGCGCCTAGAGG<br>CTAGTAAG     | n/a                               | ChIP-qPCR primer to check histone occupancy over superbinder position              |
| WT <i>Ttc25</i> -1nuc F                                 | TGTGCTTGGTCA<br>AGGATCAC     | chr11:100406617-<br>100406697     | ChIP-qPCR primer to check histone occupancy over WT -1 nucleosome position         |
| WT <i>Ttc25</i> -1nuc R                                 | GAATTTTGGAA<br>CGGAGTCA      | chr11:100,406,617-<br>100,406,697 | ChIP-qPCR primer to check histone occupancy over WT -1 nucleosome position         |
| <i>Ttc25</i> flanking -1 nuc F (Primer Set D)           | CCCATCACACTTT<br>CCATTGC     | chr11:100,406,510-<br>100,406,708 | ChIP-qPCR primer to check histone occupancy flanking WT -1 nucleosome position     |
| <i>Ttc25</i> flanking -1 nuc R (Primer Set D)           | GGAAGGAGAGAG<br>AATTTTGGAA   | chr11:100,406,510-<br>100,406,708 | ChIP-qPCR primer to check histone occupancy flanking WT -1 nucleosome position     |
| <i>Ttc25</i> mRNA (Primer Set G)                        | TGTTGTTGACCA<br>GTGGCAGT     | chr11:100,415,022-<br>100,415,273 | qPCR primer to check <i>Ttc25</i> mRNA expression levels and RNPII occupancy       |
| <i>Ttc25</i> mRNA (Primer Set G)                        | TGTTGGGTACCT<br>CCTCTTGG     | chr11:100,415,022-<br>100,415,273 | qPCR primer to check <i>Ttc25</i> mRNA expression levels and RNPII occupancy       |
| <i>Ttc25</i> primer upstream of -1 nuc (Primer Set C)   | CTCCAGGGCTGG<br>CTAATACA     | chr11:100,406,293-<br>100,406,363 | ChIP-qPCR primer to check RNAPII occupancy upstream of <i>Ttc25</i>                |
| <i>Ttc25</i> primer upstream of -1 nuc (Primer Set C)   | TCTGTTTCAGTTC<br>CCCCAAC     | chr11:100,406,293-<br>100,406,363 | ChIP-qPCR primer to check RNAPII occupancy upstream of <i>Ttc25</i>                |
| <i>Ttc25</i> primer downstream of -1 nuc (Primer Set E) | TGGAATTTGCCT<br>CCAATTC      | chr11:100,406,745-<br>100,406,854 | ChIP-qPCR primer to check RNAPII occupancy upstream of <i>Ttc25</i>                |
| <i>Ttc25</i> primer downstream of -1 nuc (Primer Set E) | TCCAGAGTGATC<br>GCTGTTTG     | chr11:100,406,745-<br>100,406,854 | ChIP-qPCR primer to check RNAPII occupancy upstream of <i>Ttc25</i>                |
| <i>Ttc25</i> primer over NDR (Primer Set F)             | ACGCGCTCAGCA<br>CTTGTCT      | chr11:100,406,881-<br>100,406,967 | ChIP-qPCR primer to check RNAPII occupancy over <i>Ttc25</i> NDR                   |
| <i>Ttc25</i> primer over NDR nuc (Primer Set F)         | GTTAGGCCTCCG<br>GGTGAG       | chr11:100,406,881-<br>100,406,967 | ChIP-qPCR primer to check RNAPII occupancy over <i>Ttc25</i> NDR                   |
| DHS Guide -                                             | CACCGAATTGGC<br>TACTGCCAATTC |                                   | Guide sequence to be cloned into the pX330                                         |

|                                          | C                                  |                              | CRISPR Cas9 plasmid                                                                                 |
|------------------------------------------|------------------------------------|------------------------------|-----------------------------------------------------------------------------------------------------|
| DHS Guide +                              | AAACGGAATTGG<br>CAGTAGCCAATT<br>C  |                              | Guide sequence to be cloned into the pX330 CRISPR Cas9 plasmid                                      |
| DHS Targ F                               | GGGAGTGACTTC<br>TCCGGTTT           | chr2:162754062+1627<br>54562 | Forward primer to amplify Ttc25 1.5kb sequence to clone into pBluescript                            |
| DHS Targ R                               | GCTGTGGGACAC<br>TCAACAGA           | chr2:162754062+1627<br>54562 | Reverse primer to amplify Ttc25 1.5kb sequence to clone into pBluescript                            |
| DHS Check F<br>(Primer Set A)            | GCCAAATAAAAT<br>GGCCACAG           | chr2:162754355+1627<br>54436 | Forward primer to check transfected clones for super-binder nucleosome integration                  |
| DHS Check R<br>(Primer set A)            | GACAGTGTAGAA<br>GAACCACTTTAA<br>GC | chr2:162754355+1627<br>54436 | Reverse primer to check transfected clones for super-binder nucleosome integration                  |
| DHS adjacent WT<br>nuc F                 | AAGAGAAGAAGT<br>GGCCAGGA           | chr2:162754213+1627<br>54288 | ChIP-qPCR primer to check histone occupancy flanking WT nucleosome position                         |
| DHS adjacent WT<br>nuc R                 | GTGGTGTGCCCC<br>AGATACTT           | chr2:162754213+1627<br>54288 | ChIP-qPCR primer to check histone occupancy flanking WT nucleosome position                         |
| DHS flanking WT/SB<br>nuc (Primer Set B) | CTAGAGGTGGGT<br>GGTTTTGG           | chr2:162754165+1627<br>54370 | ChIP-qPCR primer to check histone occupancy over DHS flanking nucleosome in either SB/SB or WT line |
| DHS flanking WT/SB<br>nuc (Primer Set B) | GGCCATTTTATTT<br>GGCTTTG           | chr2:162754165+1627<br>54370 | ChIP-qPCR primer to check histone occupancy over DHS flanking nucleosome in either SB/SB or WT line |

## Supplemental Table 2. Homology constructs used for creation of SB lines.

| Construct            | Synthetic sequence                                                                                                                                                                                                                                                                                                                                                                                                                                                                                                                                                                                                                                                                                                                                                                                                                                                                                                                                                                                                                                                                                                                                                                                                                              |
|----------------------|-------------------------------------------------------------------------------------------------------------------------------------------------------------------------------------------------------------------------------------------------------------------------------------------------------------------------------------------------------------------------------------------------------------------------------------------------------------------------------------------------------------------------------------------------------------------------------------------------------------------------------------------------------------------------------------------------------------------------------------------------------------------------------------------------------------------------------------------------------------------------------------------------------------------------------------------------------------------------------------------------------------------------------------------------------------------------------------------------------------------------------------------------------------------------------------------------------------------------------------------------|
| <i>Ttc25</i> +0 SB   | GCCTGCAGAATTATGTCAGGCTAGACCTTAGTTTAGACTTGCTATTAGCAAGTGTTCCATAACTATGTGACATT<br>GAAAGCTAAACCCATCACACTTTCCATTGCATTCTCATTAACATATACCGCGTGCTAAGGCGCCTAATCGGTC<br>GTAGCAGCTCTAGCACCCTAAACGCACGTACGCGCTGTCTACCGCGGTTAACCGCCAATAGGACGACT<br>TACTAGCCTCTAGGCGCGTGAAGGCGTATACAAGTGATCGGTTCCAAAATTCTCTCTCCTTCCATAGGGAC<br>CTGGAGTGCTTAAGCCTAATCCTACTTTGGAATTTTGCCTCCAATTCTCATTTTCTTGGCTTGCTTTGTCaGCG<br>AGcgTTTCCtCGTcGCAACTGGAGGGGAGAAGCAACCTACAAGCAACACGCGATCACTCTGGAGCGCCAGCG<br>TCCTGCAGG                                                                                                                                                                                                                                                                                                                                                                                                                                                                                                                                                                                                                                                                                                                                                               |
| <i>Ttc25</i> -60 SB  | GCCTGCAGAATTATGTCAGGCTAGACCTTAGTTTAGACTTGCTATTAGCAATTAACATATACCGCGTGCTAAGG<br>CGCCTAATCGGTCGTAGCAGCTCTAGCACCCTAAACGCACGTACGCGCTGTCTACCGCGGTTAACCG<br>CCAATAGGACGACTTACTAGCCTTAGGCGCGTGAAGGCGTATACAAGTGATGGTCAAGGATCACGCACT<br>AAGAAGTGACAAGAGAGAAGGCTGCCAAGCCCTCTGACTCCGGTTCCAAAATTCTCTCTCCTTCCATAGG<br>GACCTGGAGTGCTTAAGCCTAATCCTACTTTGGAATTTTGCCTCCAATTCTCATTTTCTTGGCTTGCTTTGTCa<br>GCGAGcgTTTCCtCGTcGCAACTGGAGGGGAGAAGCAACCTACAAGCAACACGCGATCACTCTGGAGCGCCA<br>GCGTCTGCAGG                                                                                                                                                                                                                                                                                                                                                                                                                                                                                                                                                                                                                                                                                                                                                                   |
| <i>Ttc25</i> +60 SB  | GCCTGCAGAATTATGTCAGGCTAGACCTTAGTTTAGACTTGCTATTAGCAAGTGTTCCATAACTATGTGACATT<br>GAAAGCTAAACCCATCACACTTTCCATTGCATTCTCATGCAAAATCCTCACGTCCCTGAGGGCTCTATTATTTTC<br>CTGTTCAATTTGGCAGGTAGAACGTTAACTATACCGCGTGCTAAGGCGCCTAATCGGTCGTAGCAGCTCTA<br>GCACCGCTTAAACGCACGTACGCGCTGTCTACCGCGGTTAACCGCCAATAGGACGACTTACTAGCCTCTAG<br>GCGCGTGAAGGCGTATACAAGTGATTTGGAATTTTGCCTCCAATTCTCATTTTCTTGGCTTGCTTTGTCaGCG<br>AGcgTTTCCtCGTcGCAACTGGAGGGGAGAAGCAACCTACAAGCAACACGCGATCACTCTGGAGCGCCAGCG<br>TCCTGCAGG                                                                                                                                                                                                                                                                                                                                                                                                                                                                                                                                                                                                                                                                                                                                                           |
| <i>Ttc25</i> +180 SB | GCCTGCAGAATTATGTCAGGCTAGACCTTAGTTTAGACTTGCTATTAGCAAGTGTTCCATAACTATGTGACATT<br>GAAAGCTAAACCCATCACACTTTCCATTGCATTCTCATGCAAAATCCTCACGTCCCTGAGGGCTCTATTATTTTC<br>CTGTTCAATTTGGCAGGTAGAACGCGTACTTTTTCAGTTCCCTAATGTGCTTGGTCAAGGATCACGCACTAAGA<br>AGTGACAAGAGAGAAGGCTGCCAAGCCCTGACTCCGGTTCCAAAATTCTCTCTCCTTCCATAGGGATTA<br>ACTATACCGCGTGCTAAGGCGCCTAATCGGTCGTAGCAGCTCTAGCACCCTTAAACGCACGTACGCGCT<br>GTCTACCGCGGTTAACCGCCAATAGGACGACTTACTAGCCTCTAGGCGCGTGAAGGCGTATACAAGTGAT<br>TCCTGCAGG                                                                                                                                                                                                                                                                                                                                                                                                                                                                                                                                                                                                                                                                                                                                                                |
| DHS-chr2             | GGAGGGGCAAGTGACGAGAAGAATGGAGACAAGACAGGCTATCTGATCAAGTCTCAAGTCTCATTATTGGGA<br>AGGCAACTAGGGTTTATAAGCACAAATTGAGGACTGTAGCTTAGCCACAAGTGCCCTTGCAAGTGGGGGCAC<br>TAAGCCACAAGTCCAGGCTGTGCTGAGAAGATCAGGTTGTTATCAGAGTGTTTCAAGTGTGGTGTGAGCT<br>GCTTGCAAAAACATCGTGCTAGGAAAACAAGCAGGGTGGAAAAGTACCACCTGTAAGTAAATAGCCTGAGG<br>TGGCTGCAGAGATGATAGCTGCTTTCTGCTAGGAATCAGCTCCCAACATTTTGCTATGTATTATAATGTAAAT<br>TCTATAGCTGAAGGCCTATGCTGGGAGTGACTTCTCCGGTTTACAAGCTGTTGTTGTGCAAACCTGTTCTCT<br>TGGTTTAAACTATTGGTTAAATAAAATTGGCTACTGCCAATTCCTGGAGGAACTAGAGGTGGGTGGTTTTGG<br>GTGATGTTAACTATACCGCGTGCTAAGGCGCCTAATCGGTCGTAGCAGCTCTAGCACCCTTAAACGCAC<br>GTACGCGCTGTCTACCGCGGTTAACCGCCAATAGGACGACTTACTAGCCTCTAGGCGCGTGAAGGCGTAT<br>ACAAGTGATACCAGTAAGCAGTCAAAGCCAAATAAAATGGCCACAGTCTGAGTCTCATTATTTGTAAGCTAG<br>TTAGAATAAGCTTAAAGTGTTCTTCTACACTGTCCCTCAGCAGCTGCTGTCACTTTCTGAAGGCTTACCACAT<br>TTTTTTTTTCAGTCACATTGGATATGGGAGTAGCCACTGGCACTTACATGGATAGAGCTCAGGGAGTCTGTG<br>AGTGTCCACAGCACAGAGGATCACCCGTGACAAAAAACCATCTGACCCAGGGGCCAGCAACGTGGAGAC<br>TGAGAGCCCGGCTCTAAATGGATCTCCTGCAGATGTTCTGAAAGTTTTATTTTACCAGGGATATTTGTTGA<br>GACAGGGTCTCAGTATGTAGCCAGGCTGGCTTTGAACTCACAGAGATTCCCCTGTCTCTGCCTCCCAAGT<br>TCTGGGGGCAATTTGGAGATAAAATAAATATATATATTATCTAAAAGTGTGTATGTGTTTAGAGGTATGTA |

## SUPPLEMENTAL REFERENCES

Anders S, Huber W. 2010. Differential expression analysis for sequence count data.

*Genome Biology*, **11**: R106.

Cong L, Ran FA, Cox D, Lin S, Barretto R, Habib N, Hsu PD, Wu X, Jiang W, Marraffini

LA, et al. 2013. Multiplex Genome Engineering Using CRISPR/Cas Systems.

*Science* **339**: 819–823.



- de Hoon MJL, Imoto S, Nolan J, Miyano S. 2004. Open source clustering software. *Bioinformatics* **20**: 1453–1454.
- Gu W, Lee H-C, Chaves D, Youngman EM, Pazour GJ, Conte D Jr, Mello CC. 2012. CapSeq and CIP-TAP Identify Pol II Start Sites and Reveal Capped SmallRNAs as *C. elegans* piRNA Precursors. *Cell* **151**: 1488–1500.
- Ho L, Miller EL, Ronan JL, Ho WQ, Jothi R, Crabtree GR. 2011. esBAF facilitates pluripotency by conditioning the genome for LIF/STAT3 signalling and by regulating polycomb function. *Nature Cell Biology* **13**: 903–913.
- Kumar R, Ichibhashi Y, Kimura S, Chitwood DH, Headland LR, Peng J, Maloof JN, Sinha NR. 2012. A high-throughput method for Illumina RNA-seq library preparation. *Front Plant Science* **3**: 202
- Levin JZ, Yassour M, Adiconis X, Nusbaum C, Thompson DA, Friedman N, Gnirke A, Regev A. 2010. Comprehensive comparative analysis of strand-specific RNA sequencing methods. *Nature Methods* **7**: 709–715.
- Mituyama T, Yamada K, Hattori E, Okida H, Ono Y, Terai G, Yoshizawa A, Komori T, Asai K. 2009. The Functional RNA Database 3.0: databases to support mining and annotation of functional RNAs. *Nucleic Acids Research* **37**: D89–D92.
- Robin X, Turck N, Hainard A, Tiberti N, Lisacek F, Sanchez J, Muller M. 2011. pROC: an open-source package for R and S<sup>+</sup> to analyze and compare ROC curves. *BMC Bioinformatics* **12**:77.

- Saldanha AJ. 2004. Java Treeview--extensible visualization of microarray data. *Bioinformatics* **20**: 3246–3248.
- Stein LD, Mungall C, Shu S, Caudy M, Mangone M, Day A, Nickerson E, Stajich JE, Harris TW, Arva A, et al. 2002. The generic genome browser: a building block for a model organism system database. *Genome Research* **12**: 1599–1610.
- Ye T, Krebs AR, Choukrallah MA, Keime C. 2011. seqMINER: an integrated ChIP-seq data interpretation platform. *Nucleic acids Research* **36**.
- Wang X, Bryant GO, Floer M, Spagna D, Ptashne M. 2011b. An effect of DNA sequence on nucleosome occupancy and removal. *Nature Structural & Molecular Biology* **18**: 507–509.
- Yildirim O, Li R, Hung J-H, Chen PB, Dong X, Ee L-S, Weng Z, Rando OJ, Fazio TG. 2011. Mbd3/NURD Complex Regulates Expression of 5-Hydroxymethylcytosine Marked Genes in Embryonic Stem Cells. *Cell* **147**: 1498–1510.

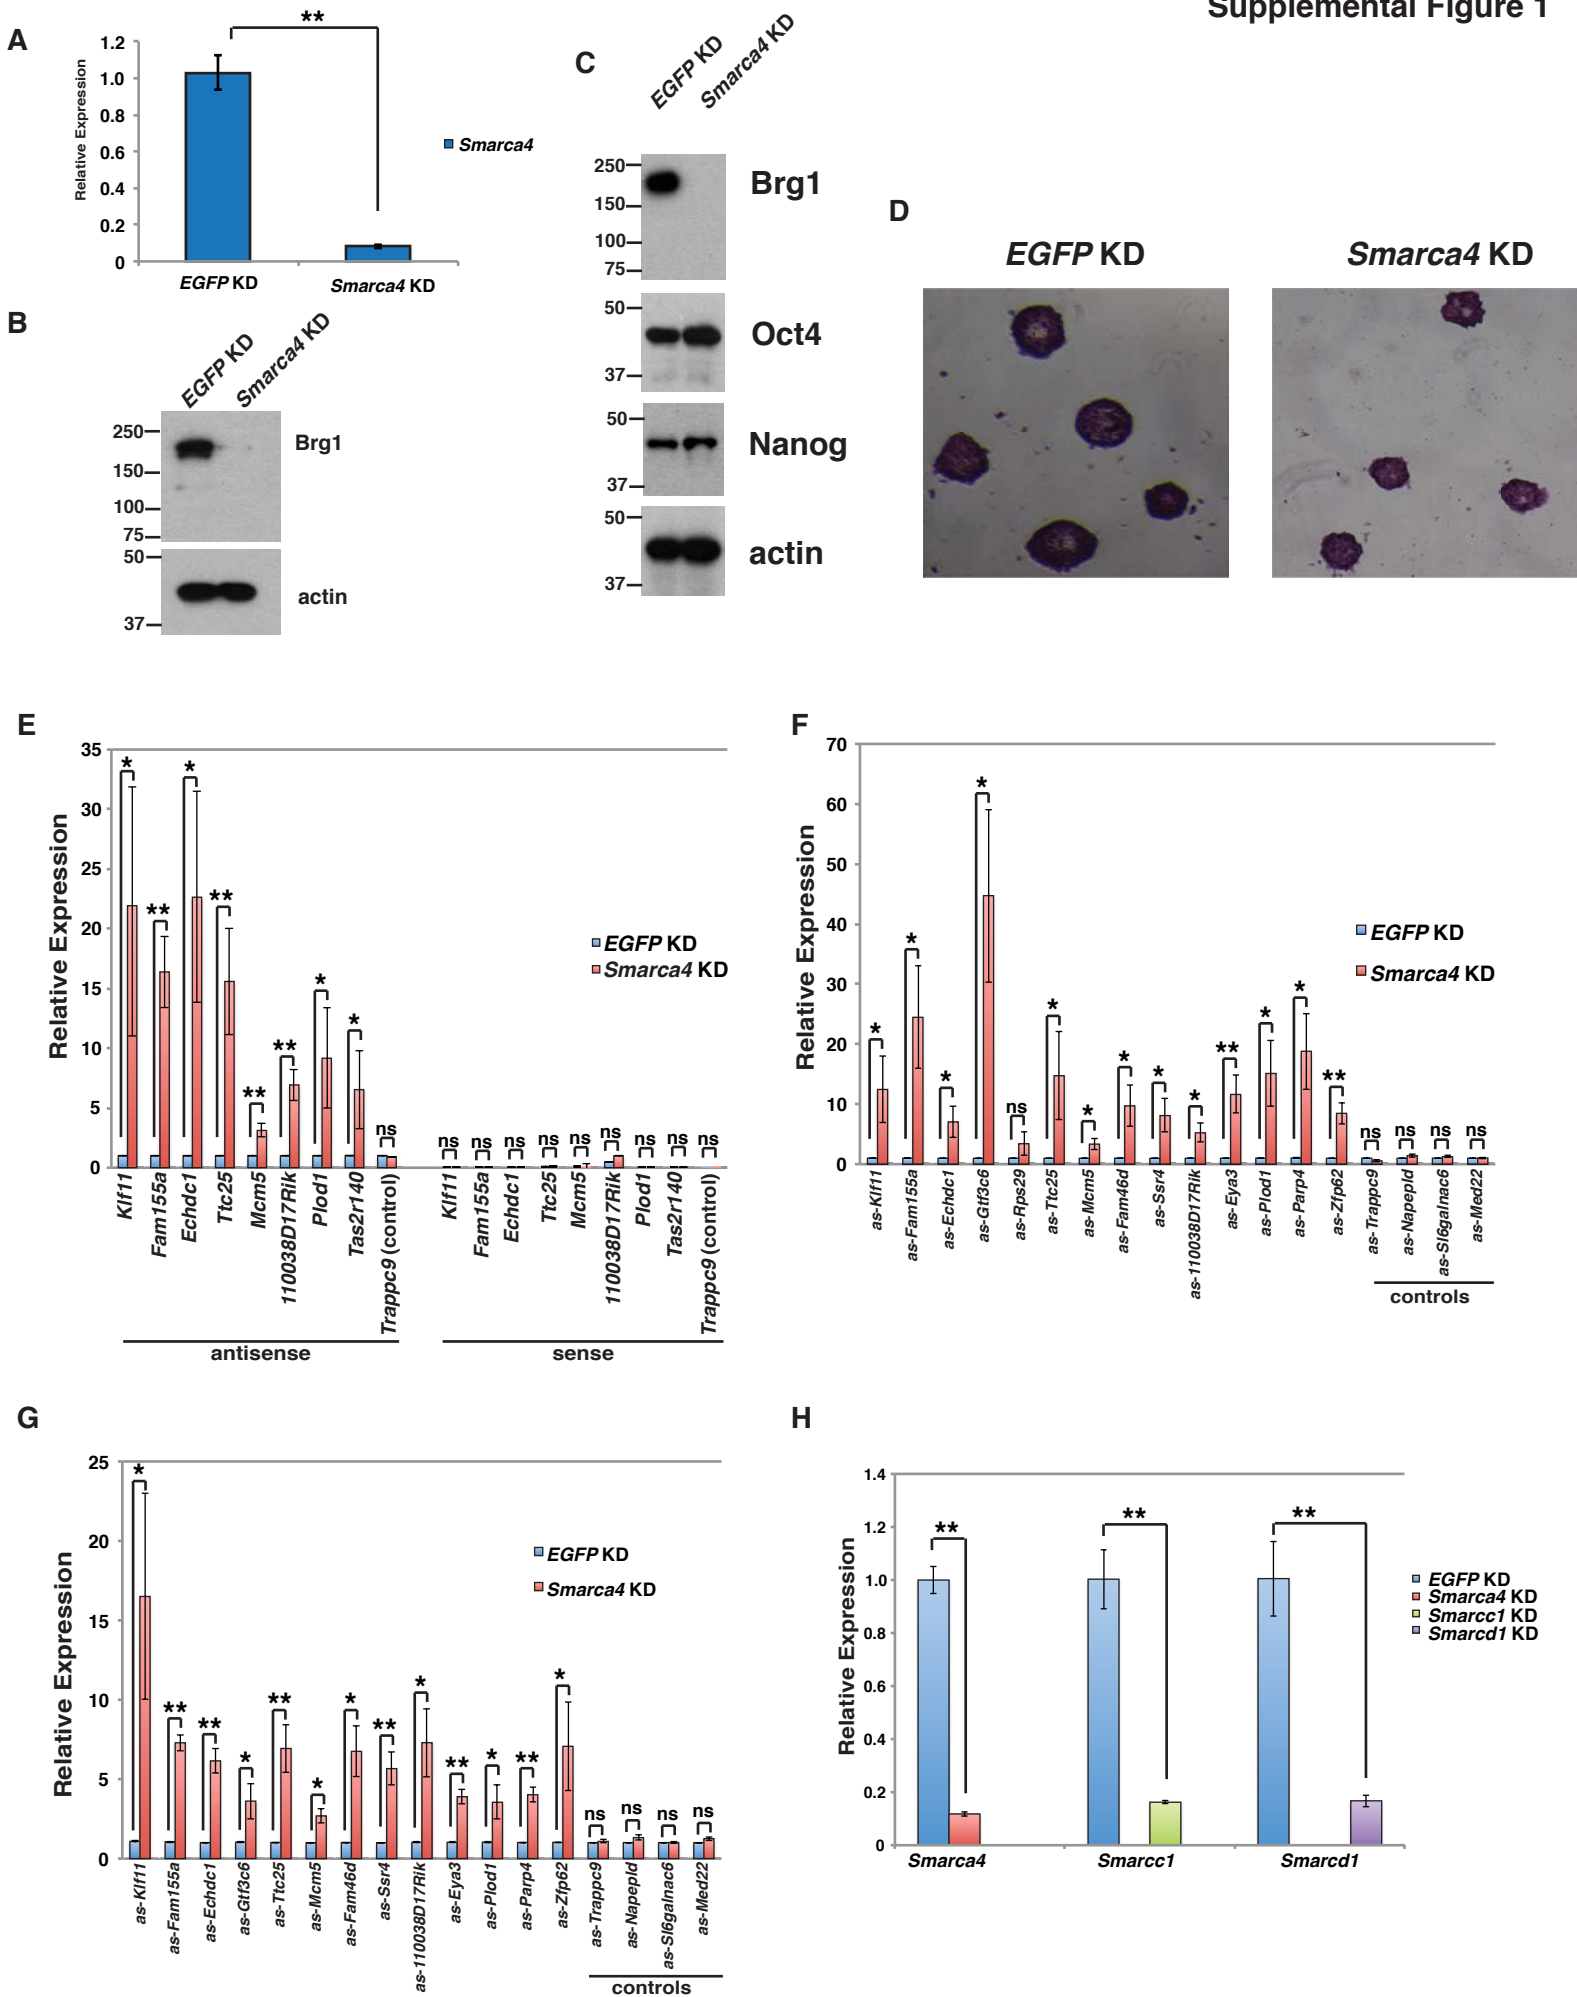

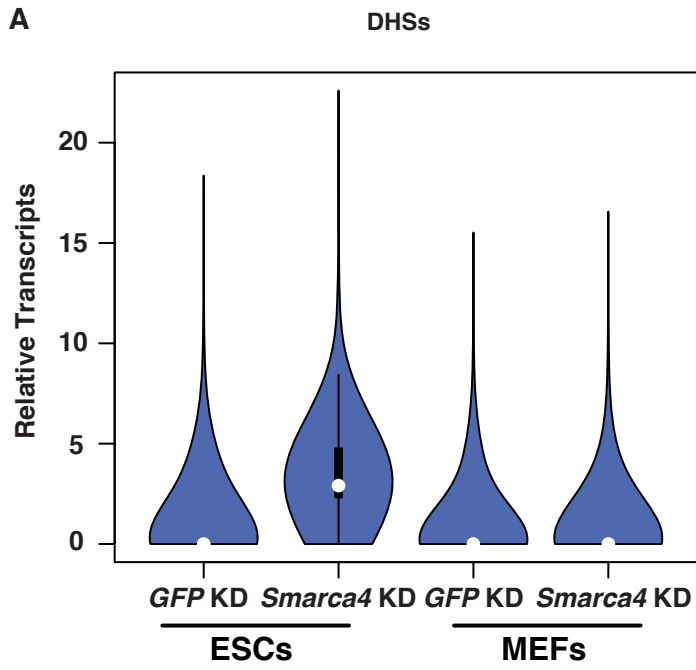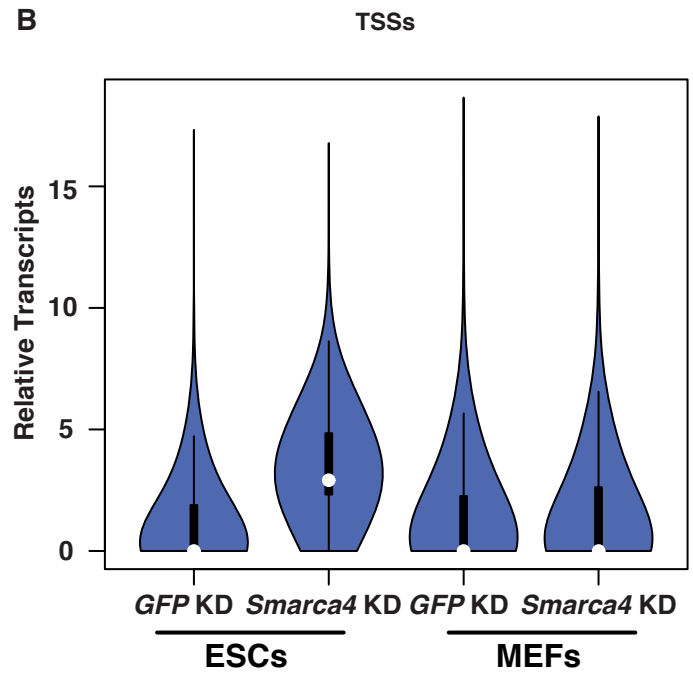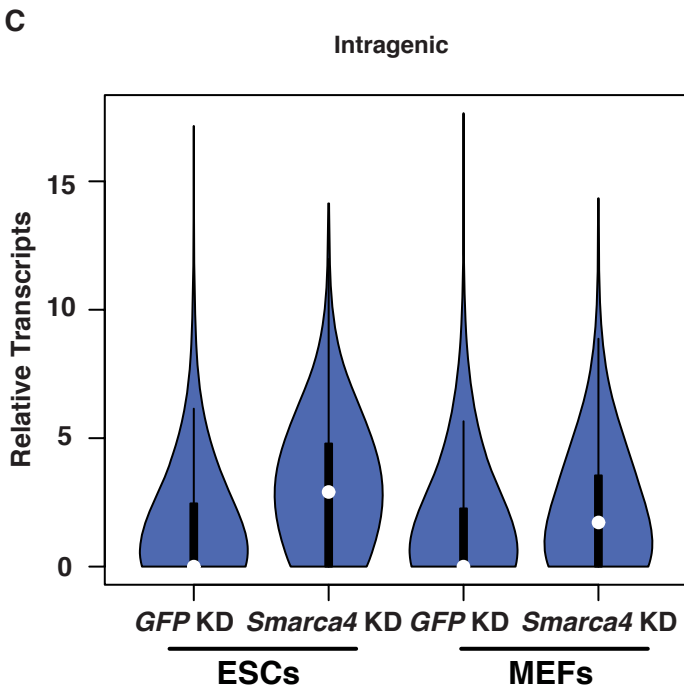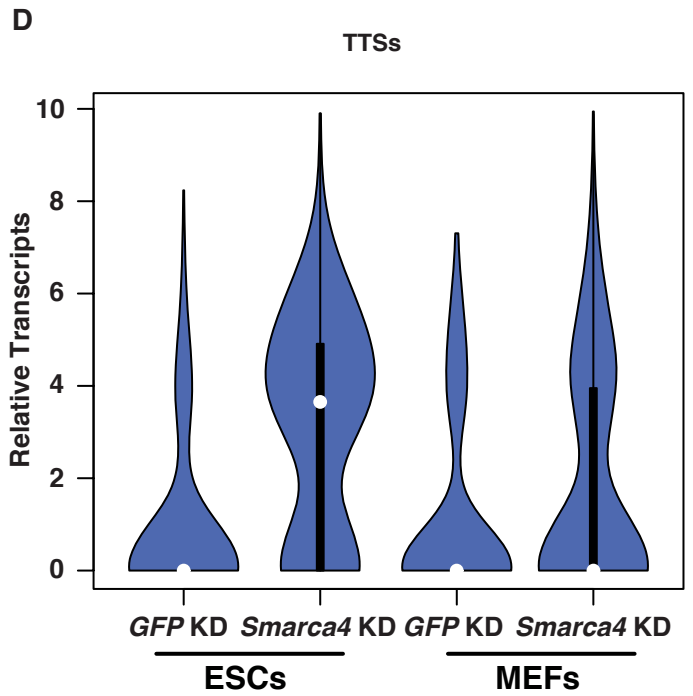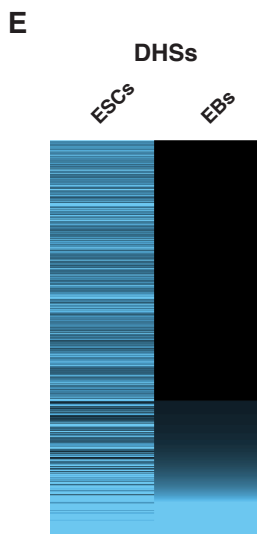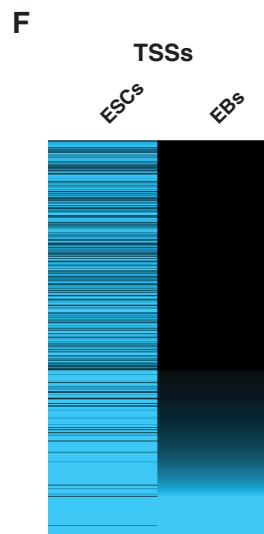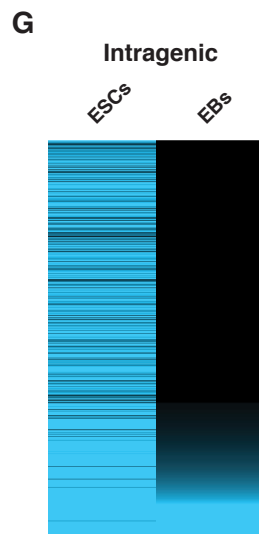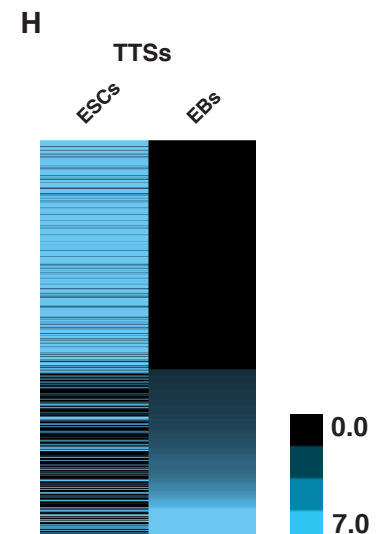

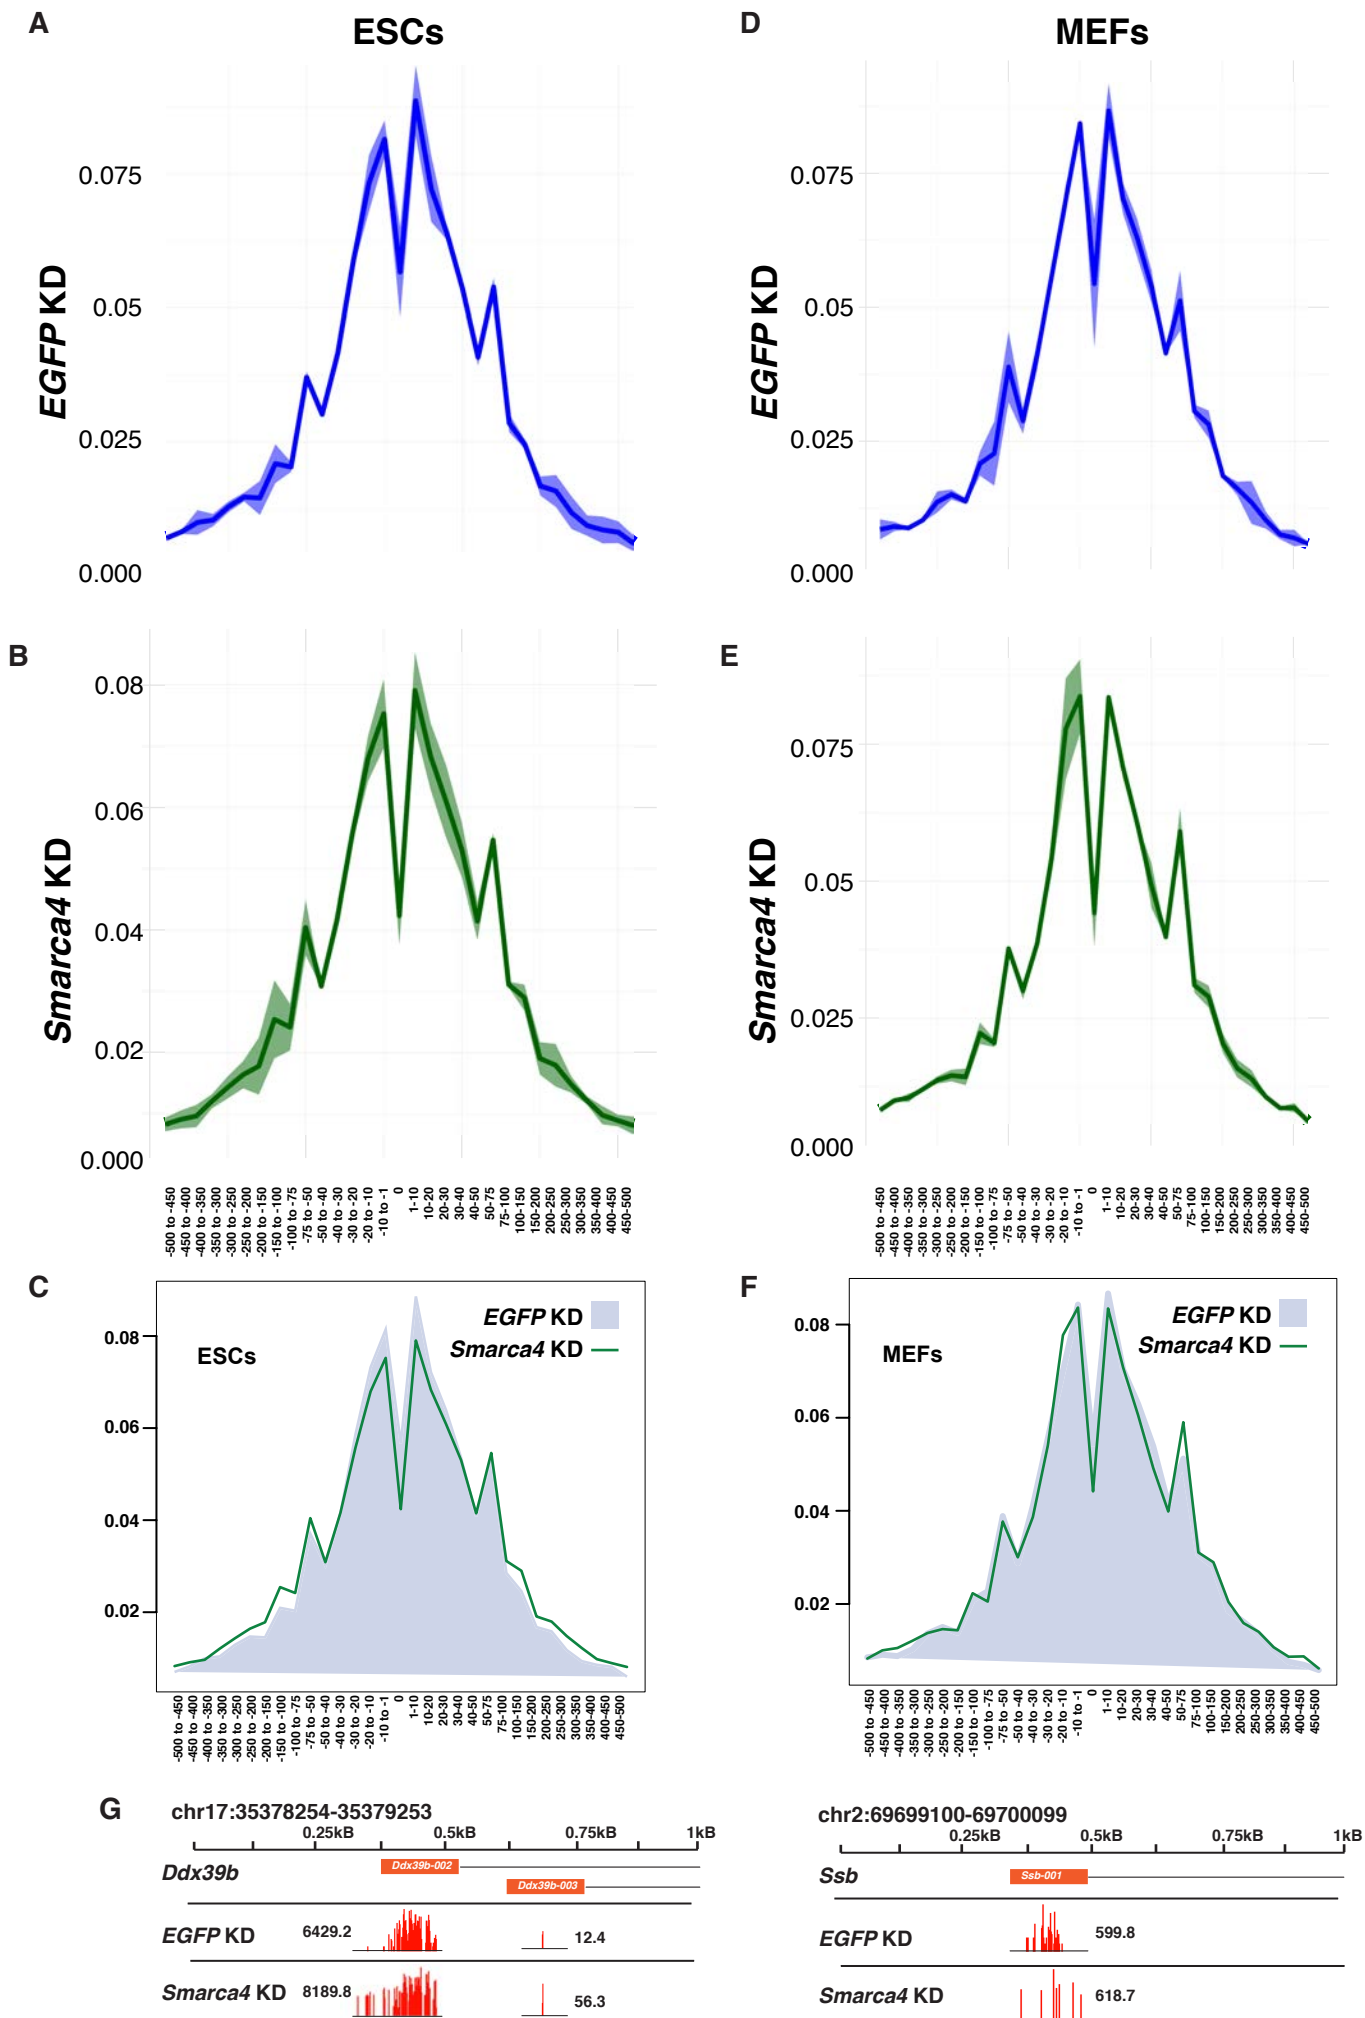

A

esBAF bound

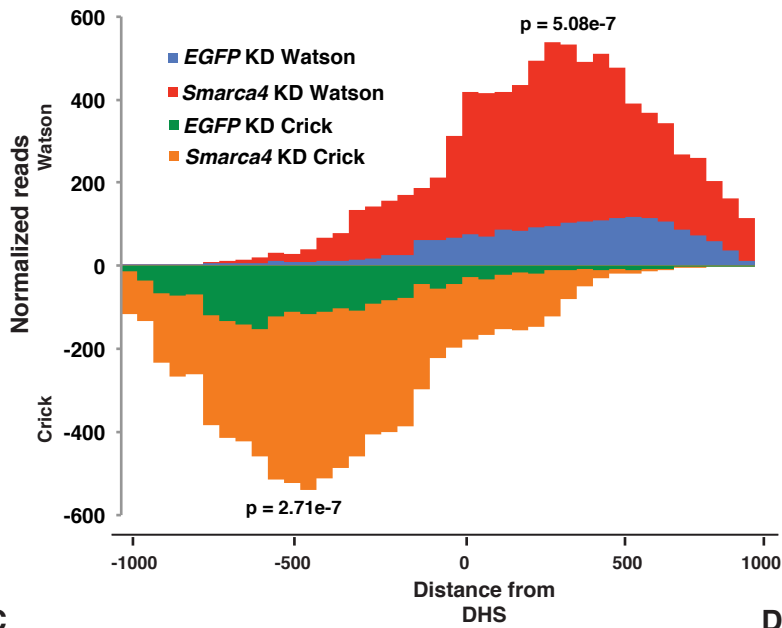

B

esBAF unbound

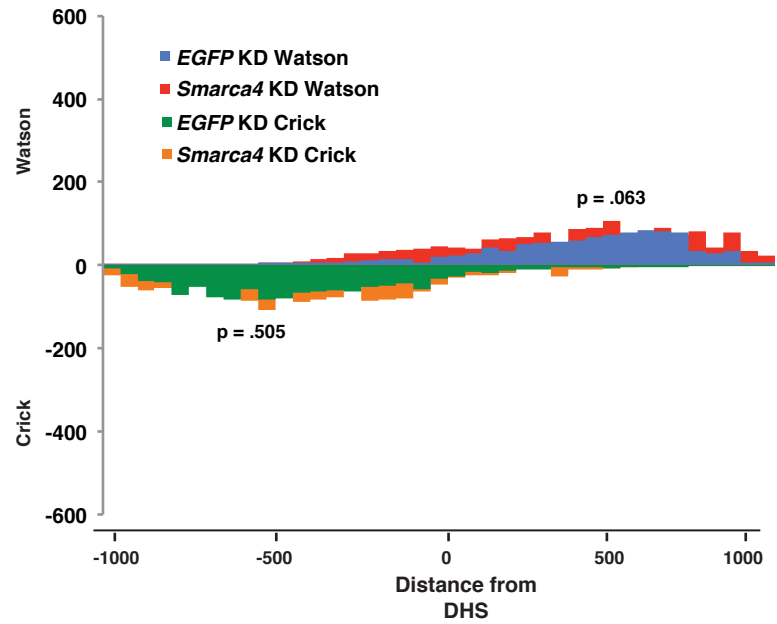

C

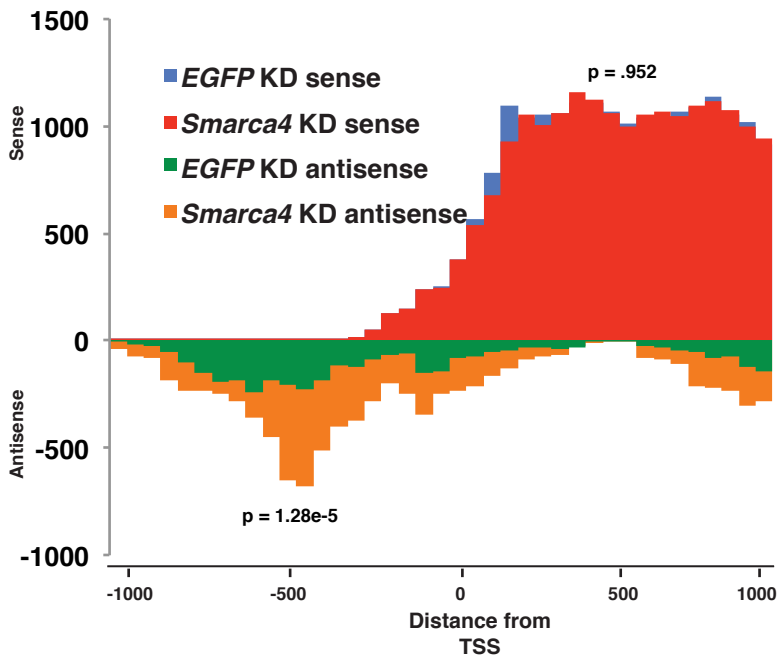

D

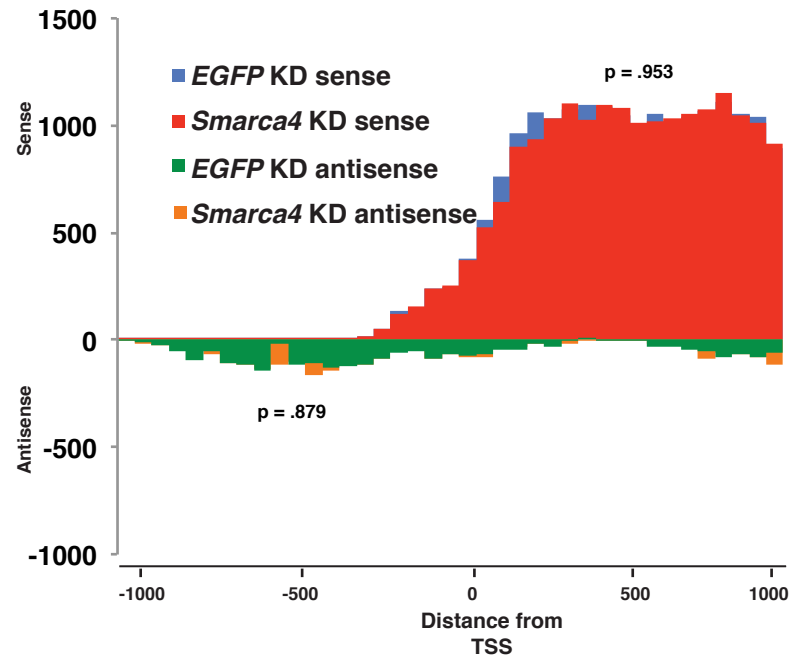

A

| Fold Change | DHS    |       | as-TSS |      | intragenic |      | as-TTS |      | mRNA  |       |
|-------------|--------|-------|--------|------|------------|------|--------|------|-------|-------|
|             | UP     | DOWN  | UP     | DOWN | UP         | DOWN | UP     | DOWN | UP    | DOWN  |
| >1.5        | 57,237 | 5,271 | 3,631  | 603  | 2,383      | 238  | 1,031  | 102  | 1,856 | 2,843 |
| >2          | 41,673 | 3,637 | 2,505  | 416  | 1,644      | 164  | 611    | 70   | 1,095 | 1,961 |
| >3          | 21,482 | 964   | 1,352  | 125  | 887        | 89   | 329    | 38   | 591   | 1,059 |
| >5          | 9,936  | 243   | 648    | 58   | 426        | 43   | 157    | 18   | 283   | 508   |

B

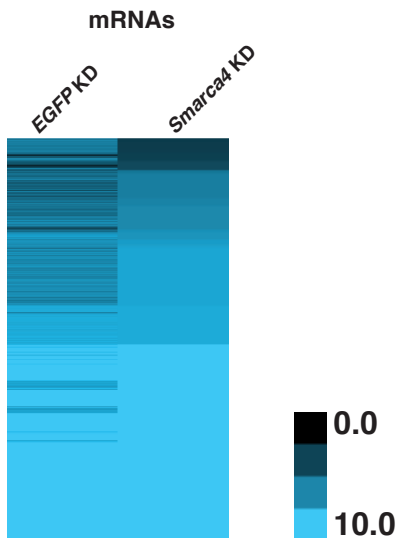

C

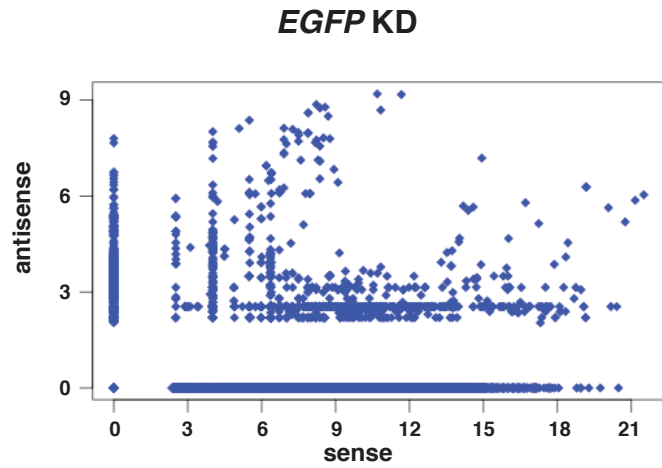

D

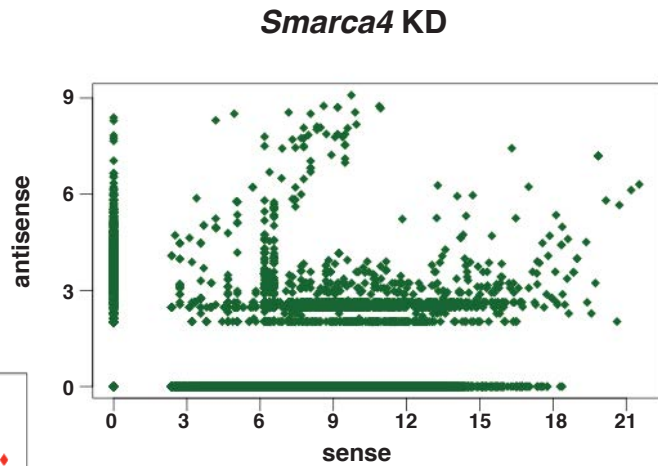

E

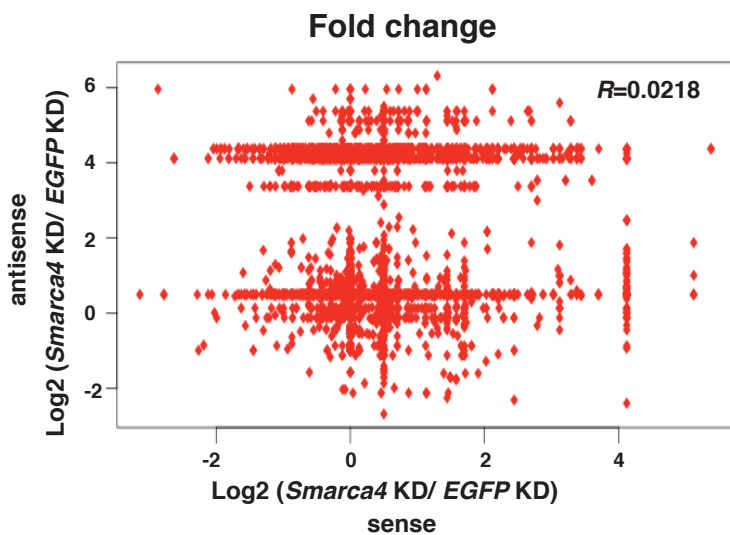

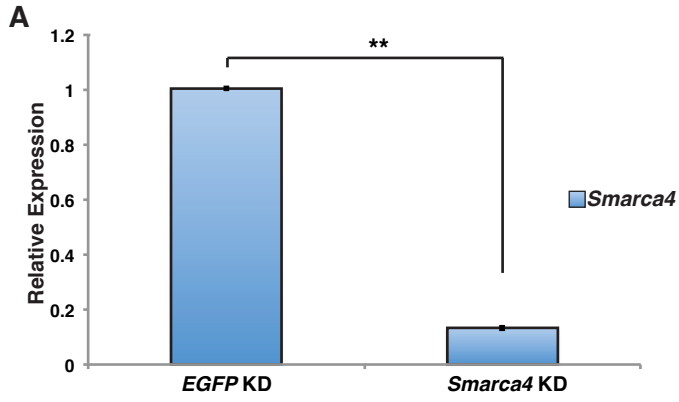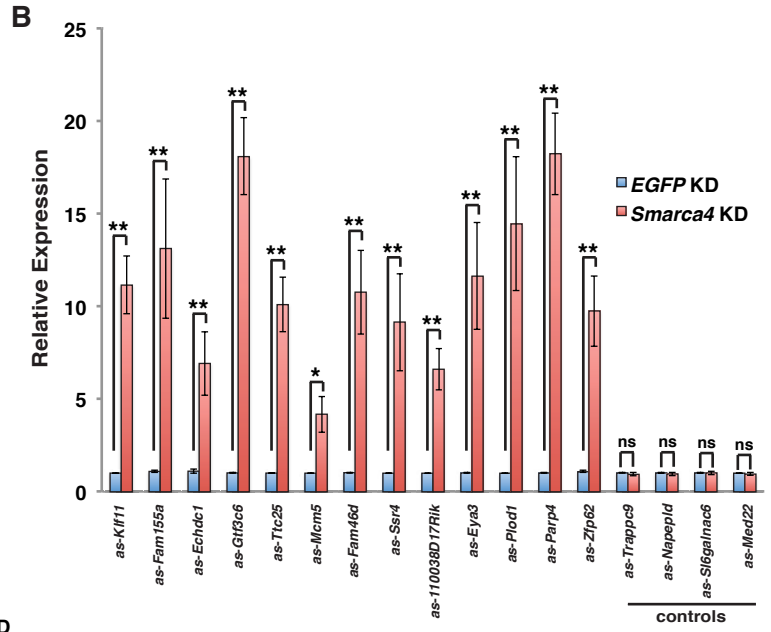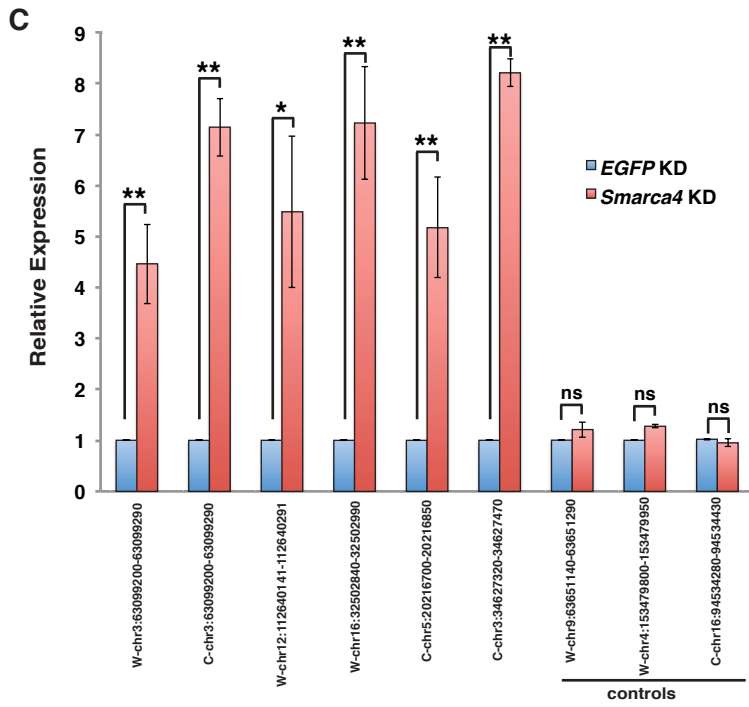



A

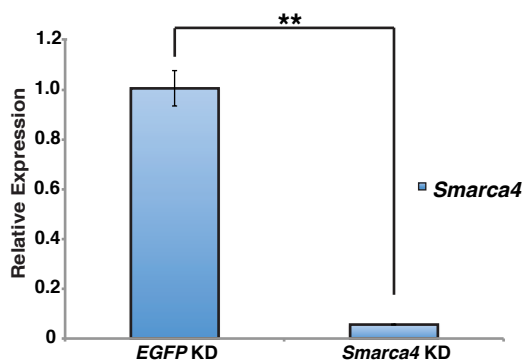

B

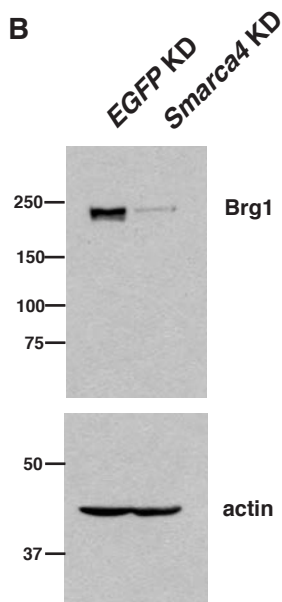

C

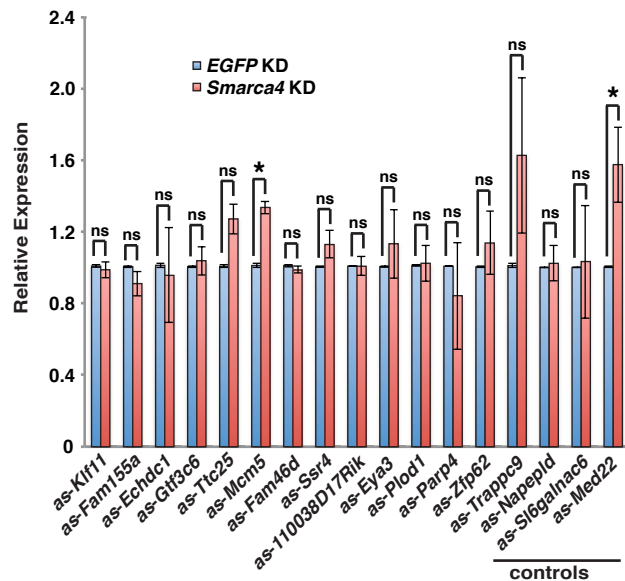

D

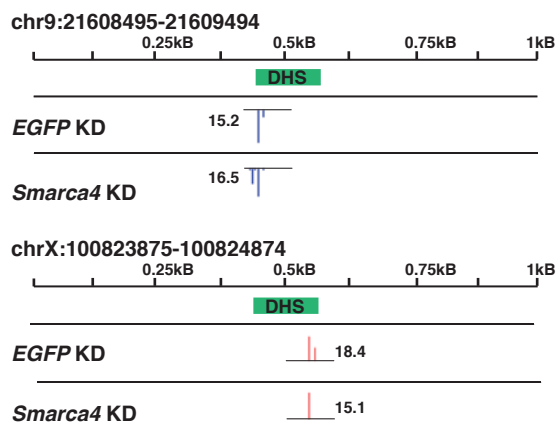

E

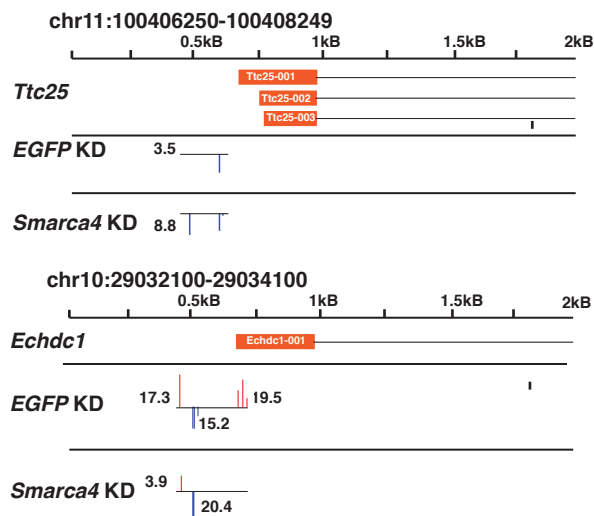

F

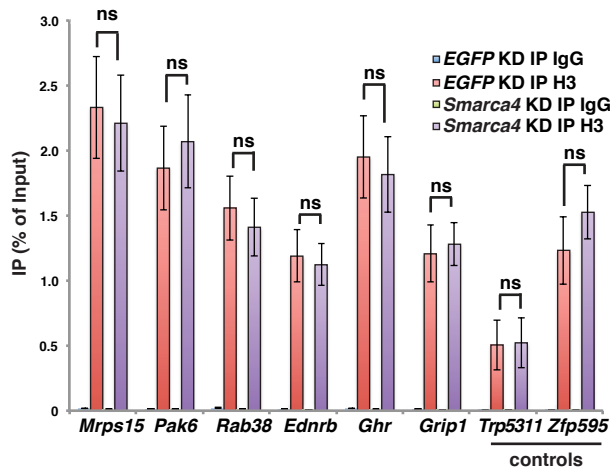

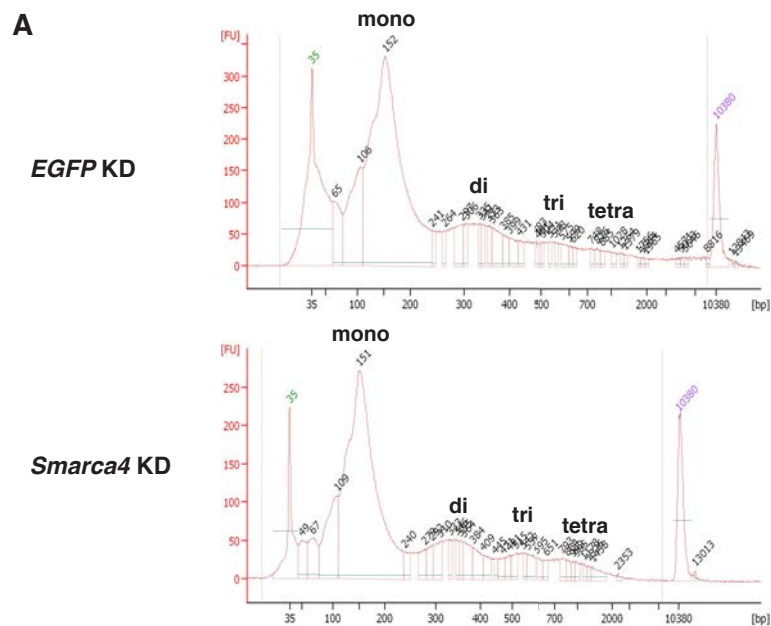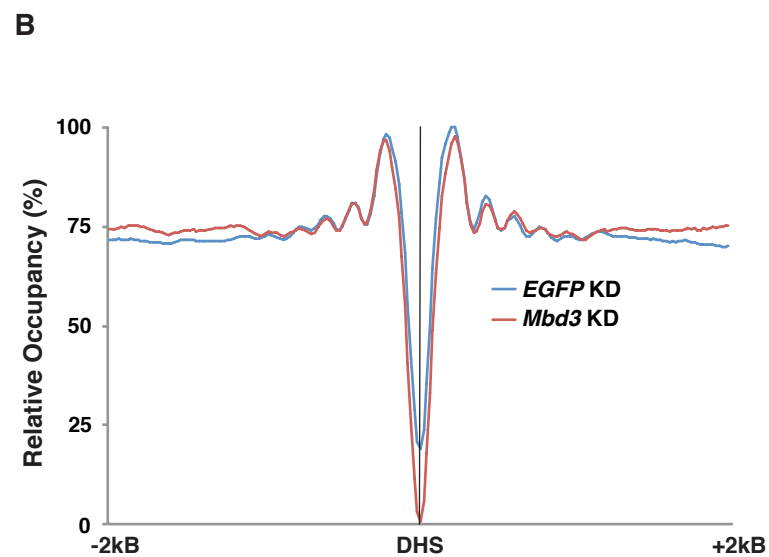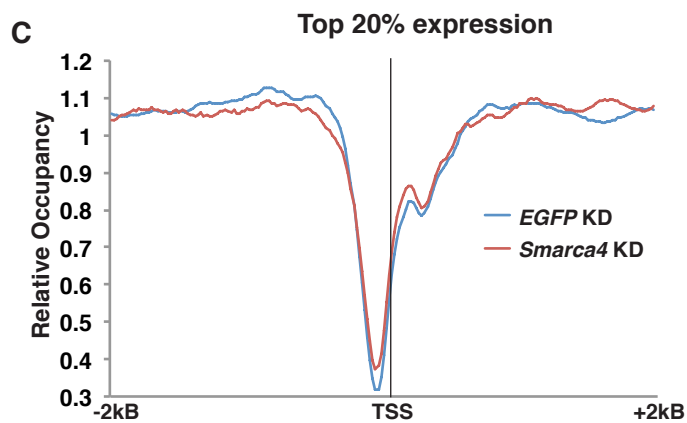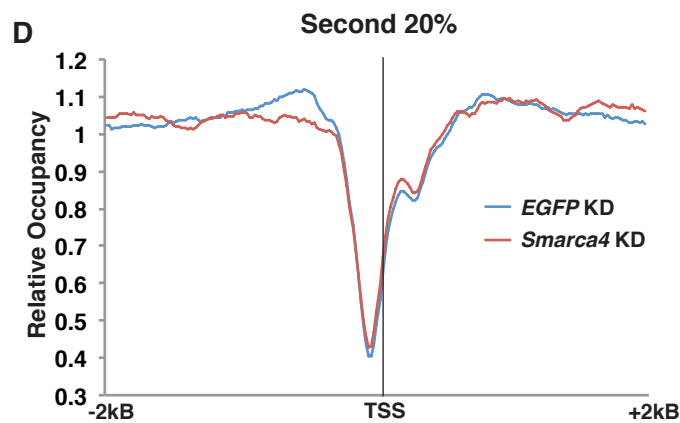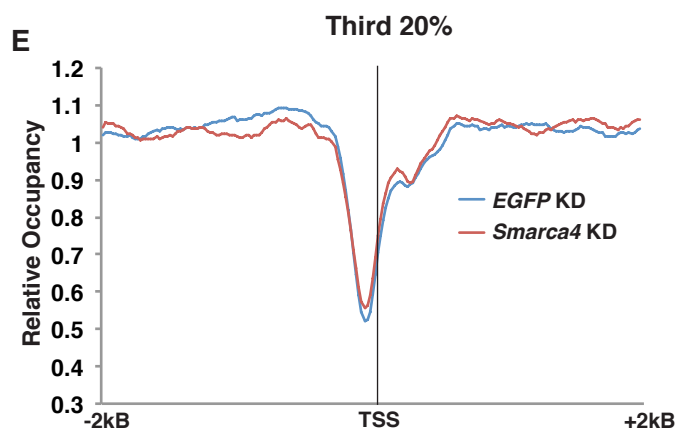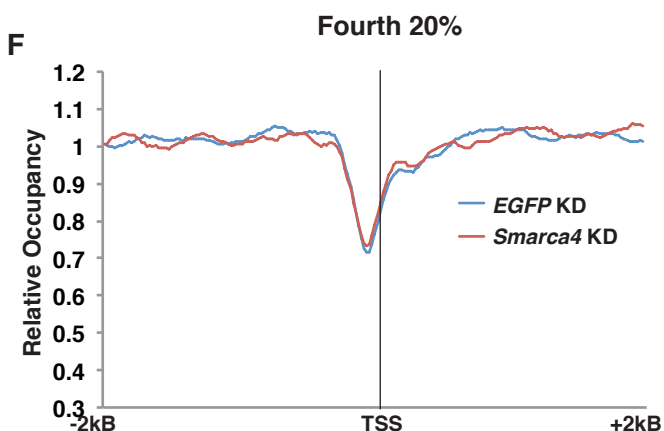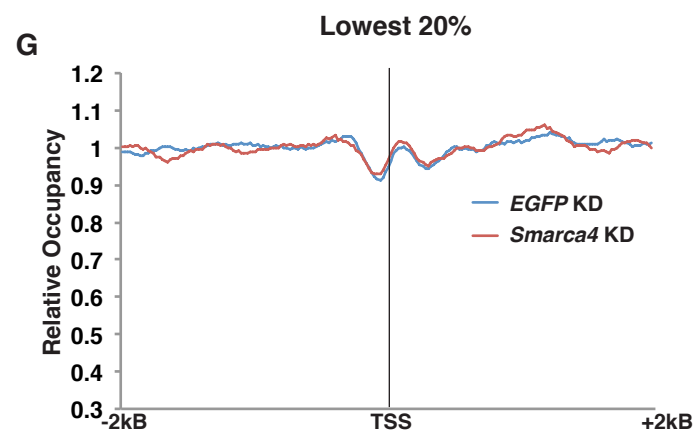

A

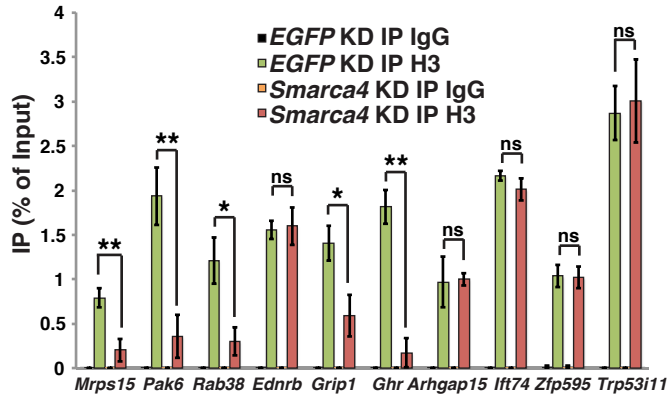

B

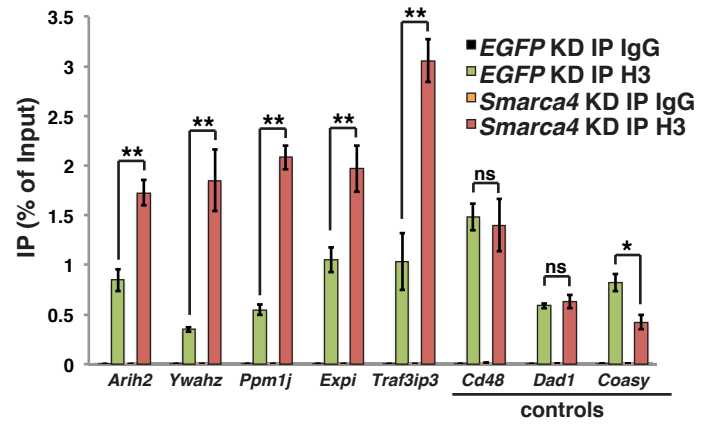

C

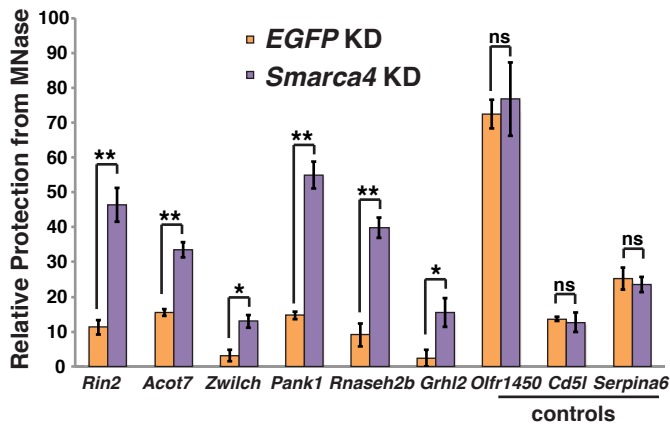

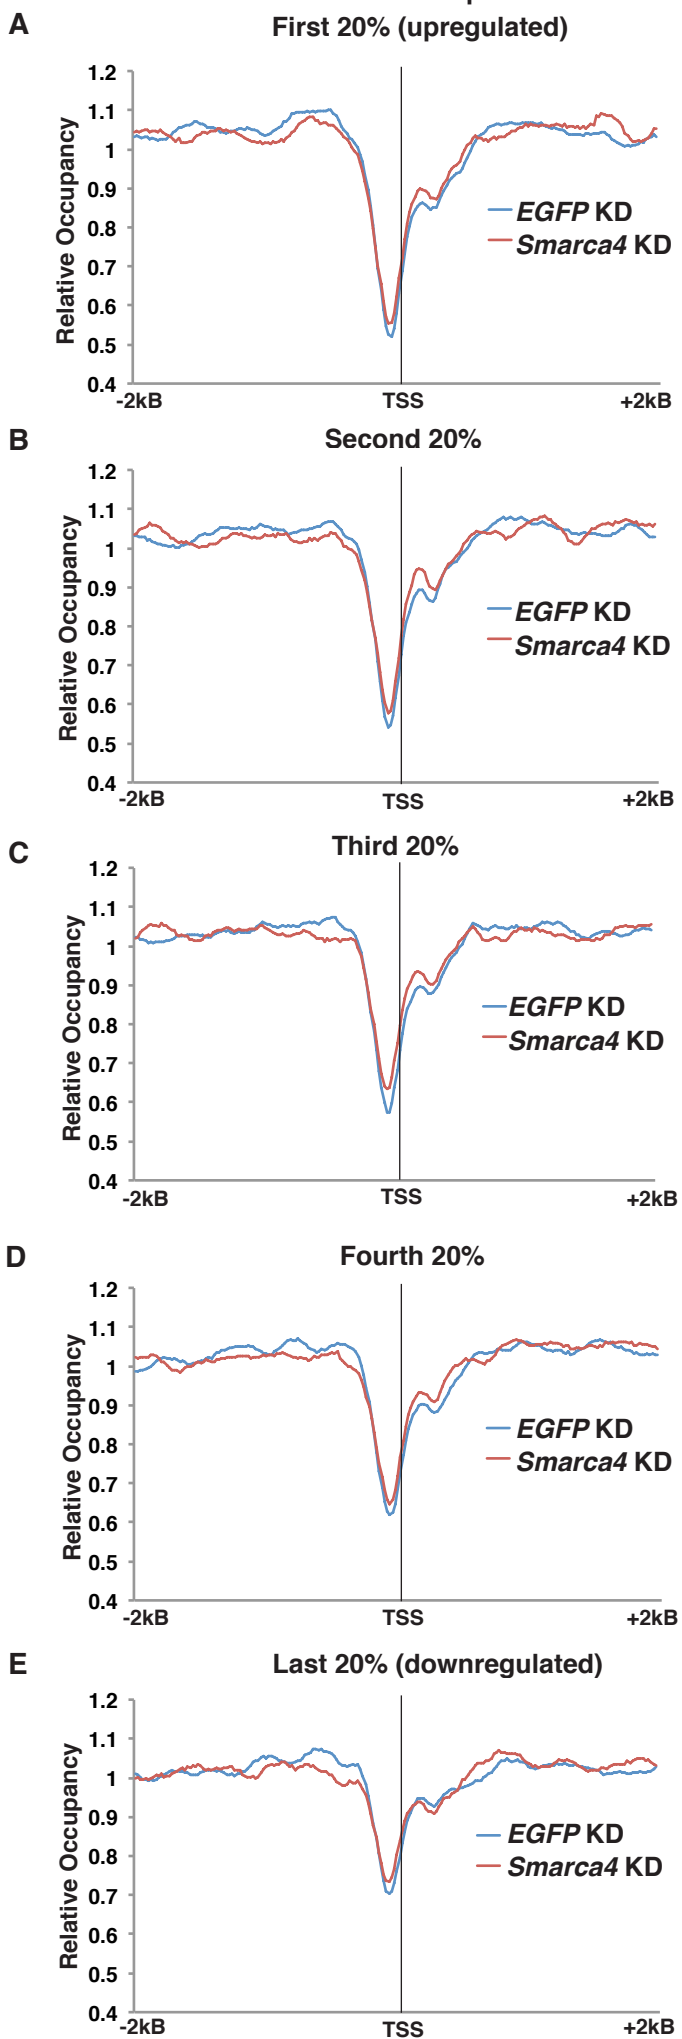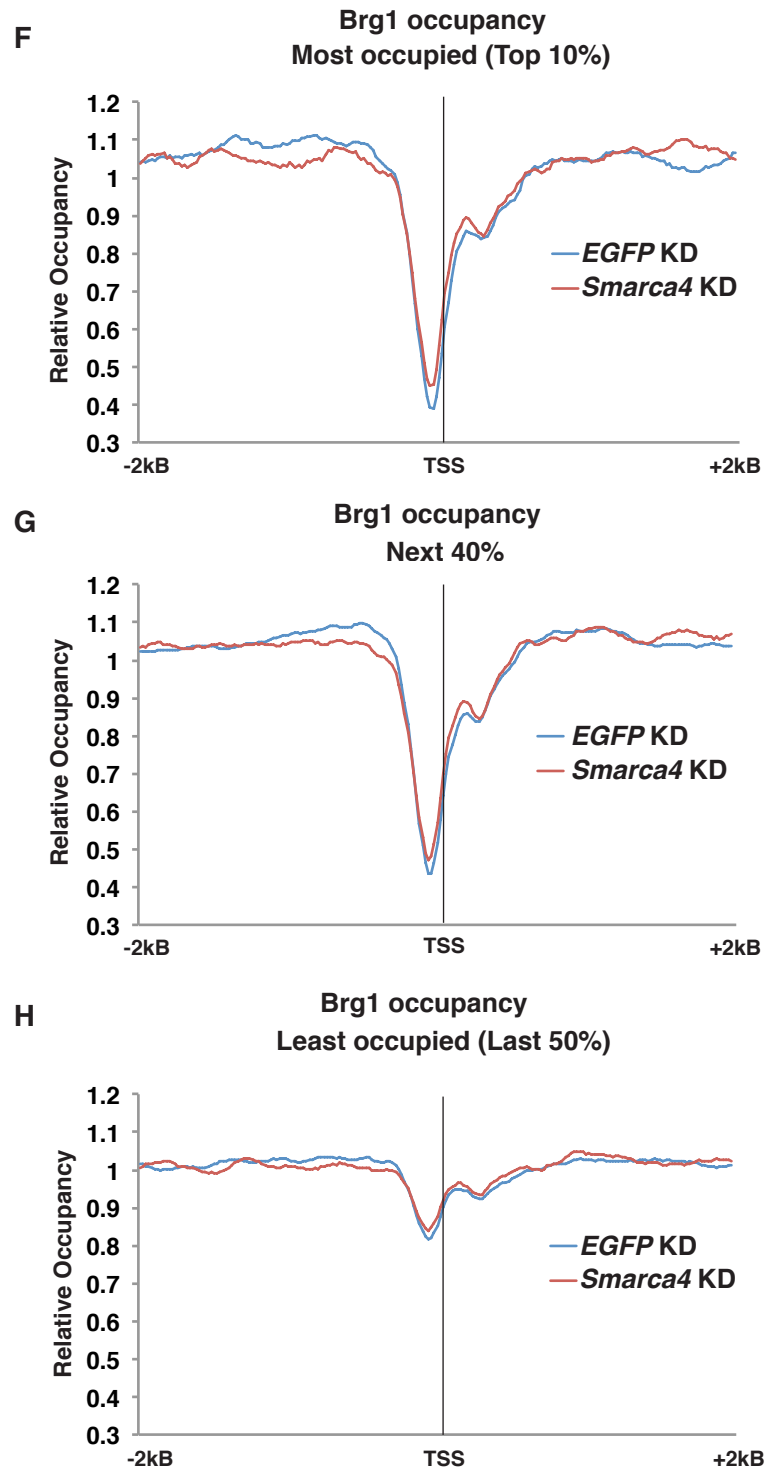

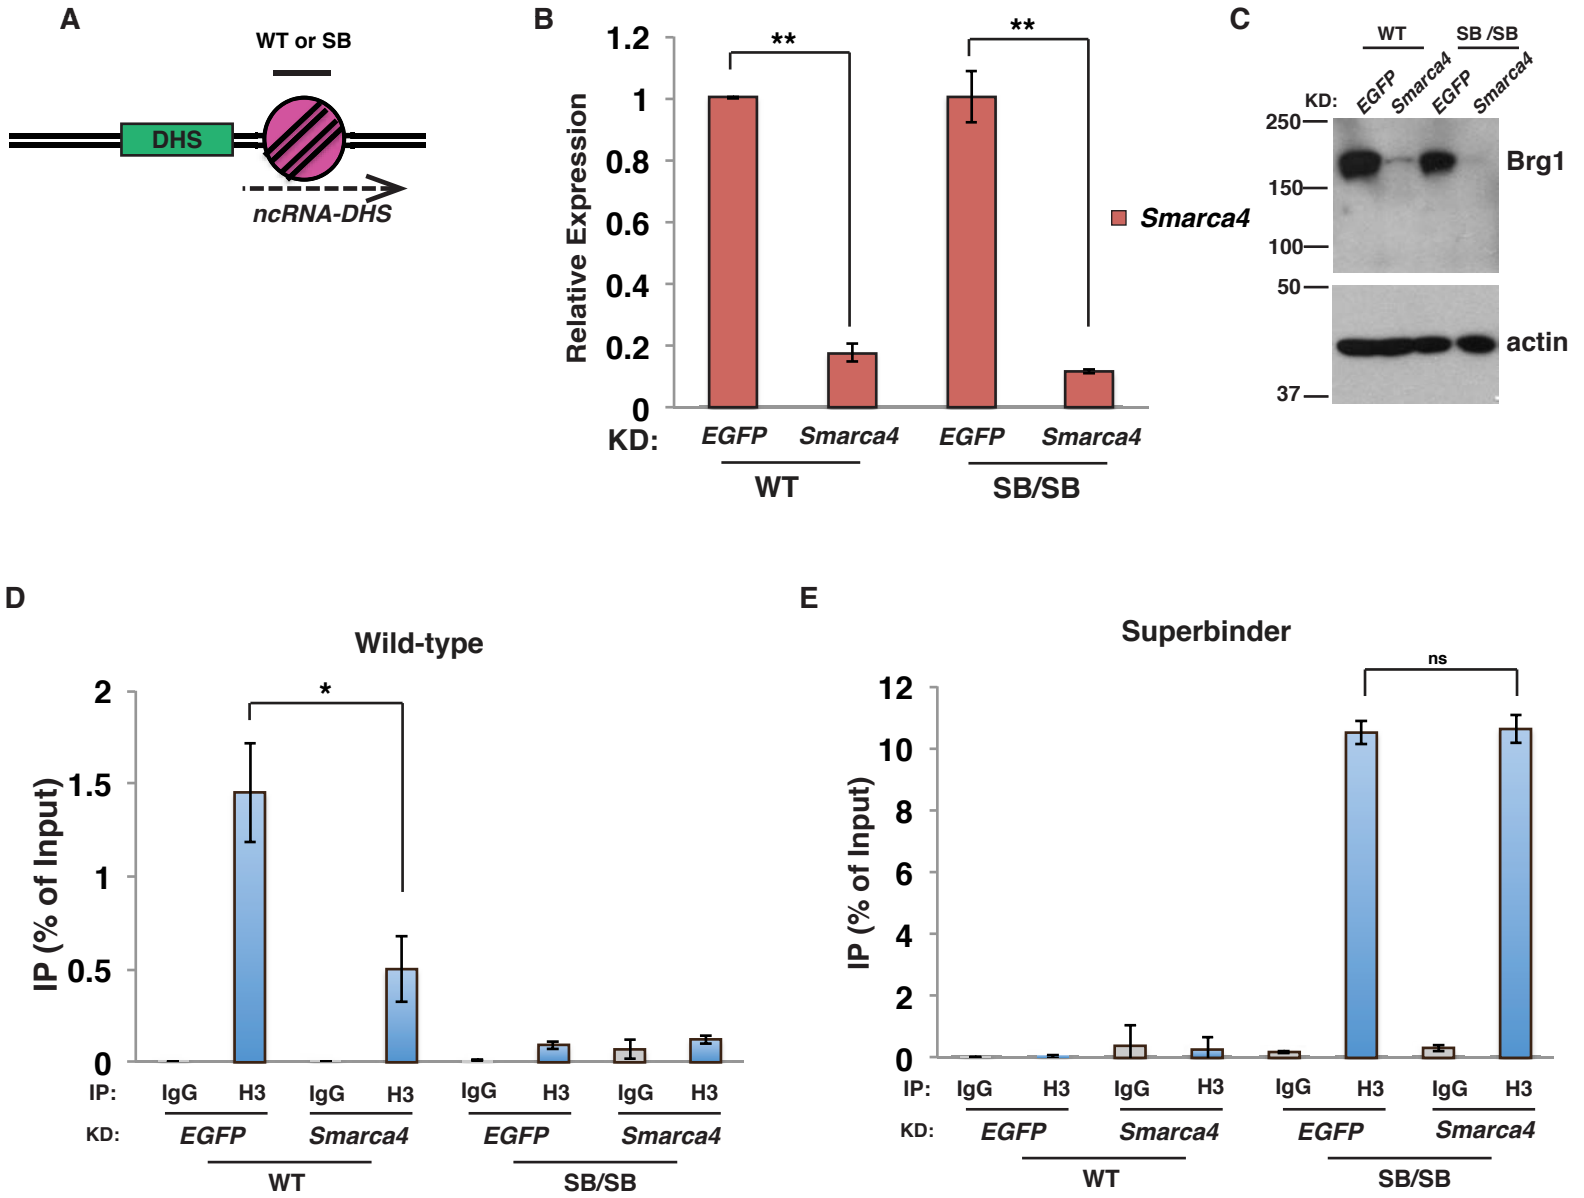



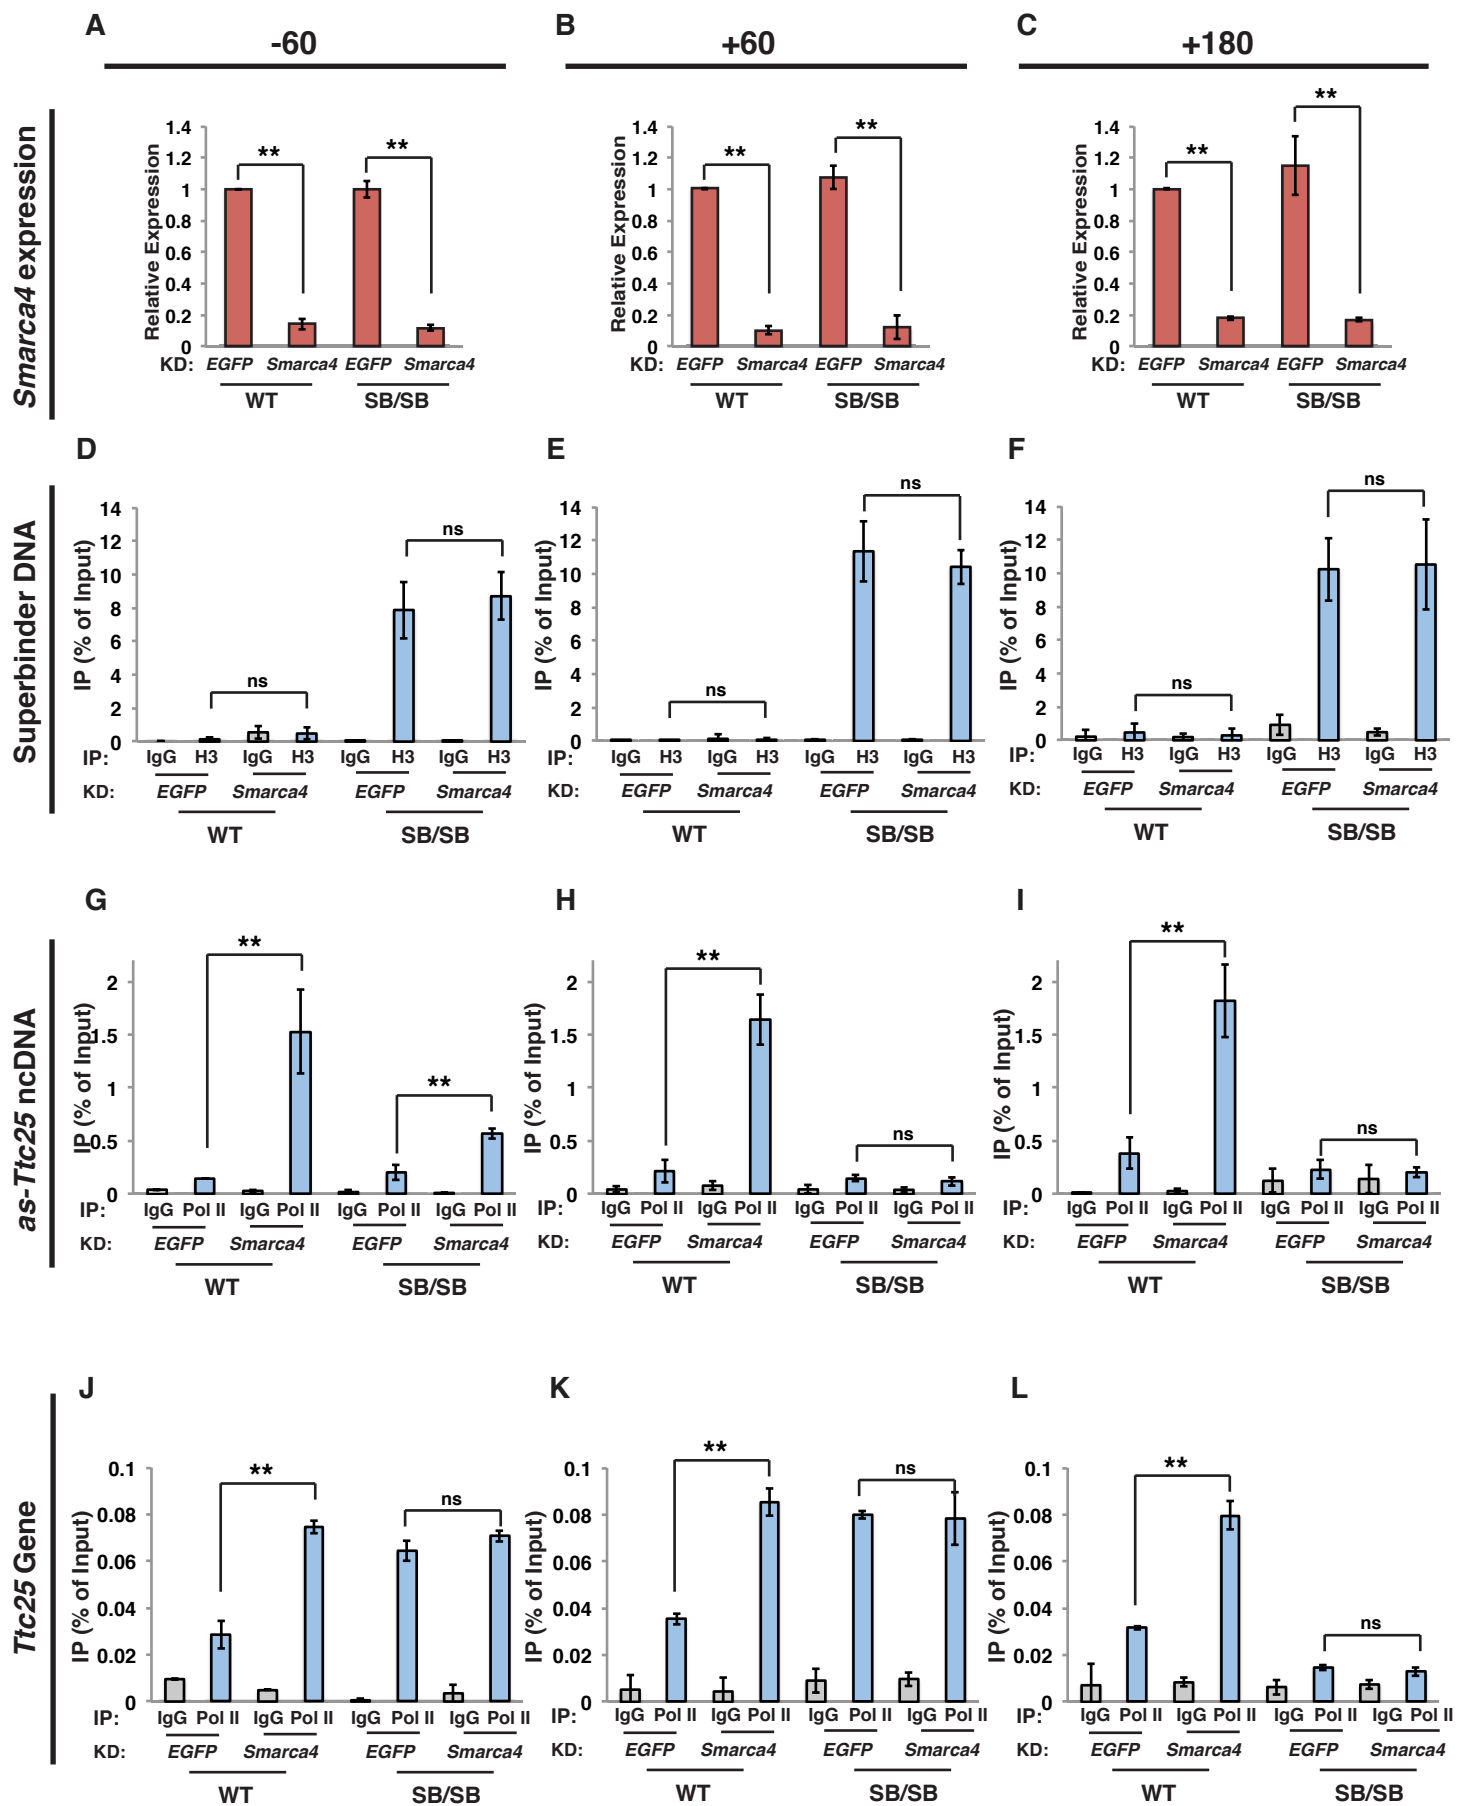

Supplement: supp_29.4.362_SuppMaterial_REV.pdf [file supp_29.4.362_SuppMaterial_REV.pdf]
